# Supplementary material for: Oncogenic Kras-Mediated Cytokine CCL15 Regulates Pancreatic Cancer Cell Migration and Invasion through ROS
Source: MDPI journal article supplement (doi:10.3390/cancers14092153), 2022-04-26

4/11/2022

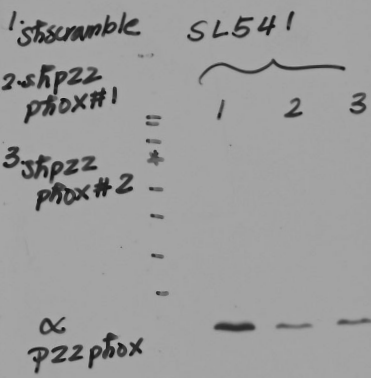

4/11/2022

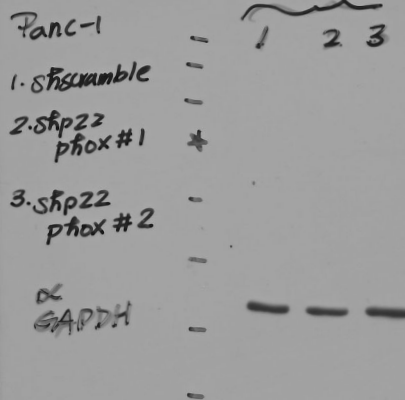

1. shscramble  
2. shp22 pfox #1  
3. shp22 pfox #2

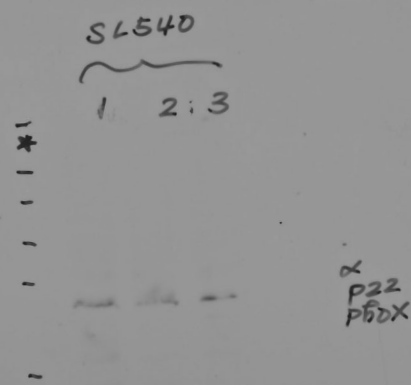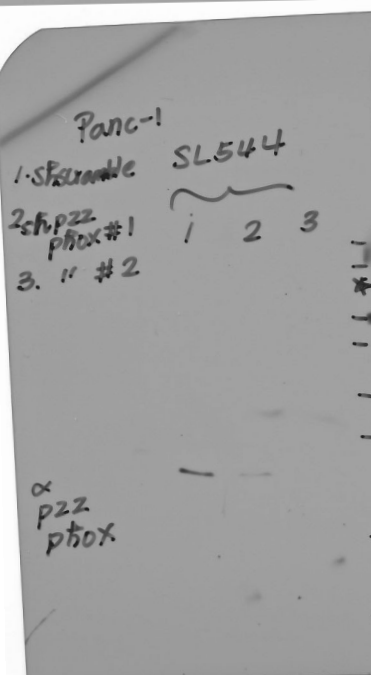

4/13/2022

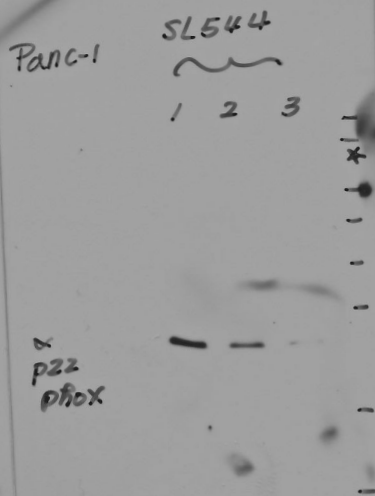

SL540

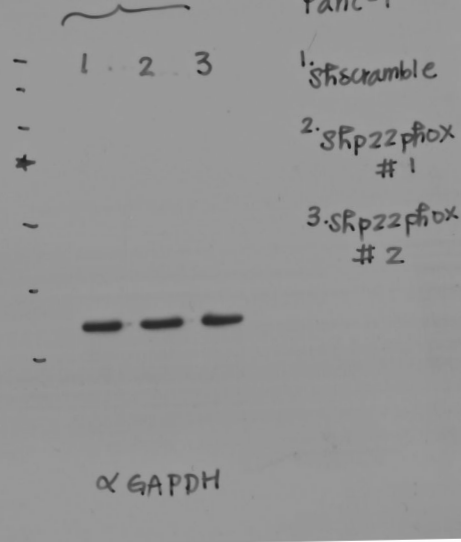

Panc-1

SL544

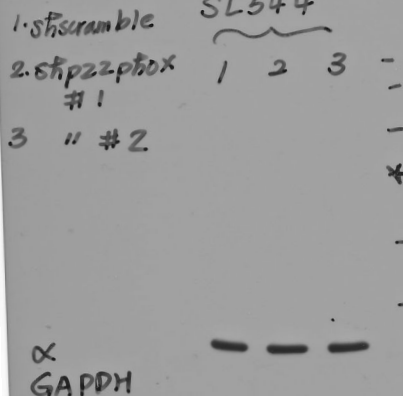

4/5/2022

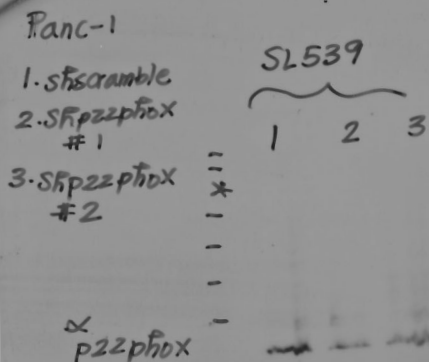

SL539

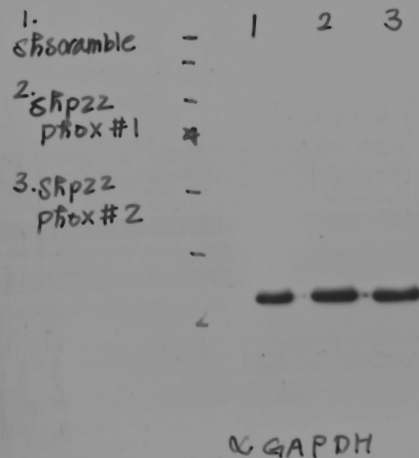



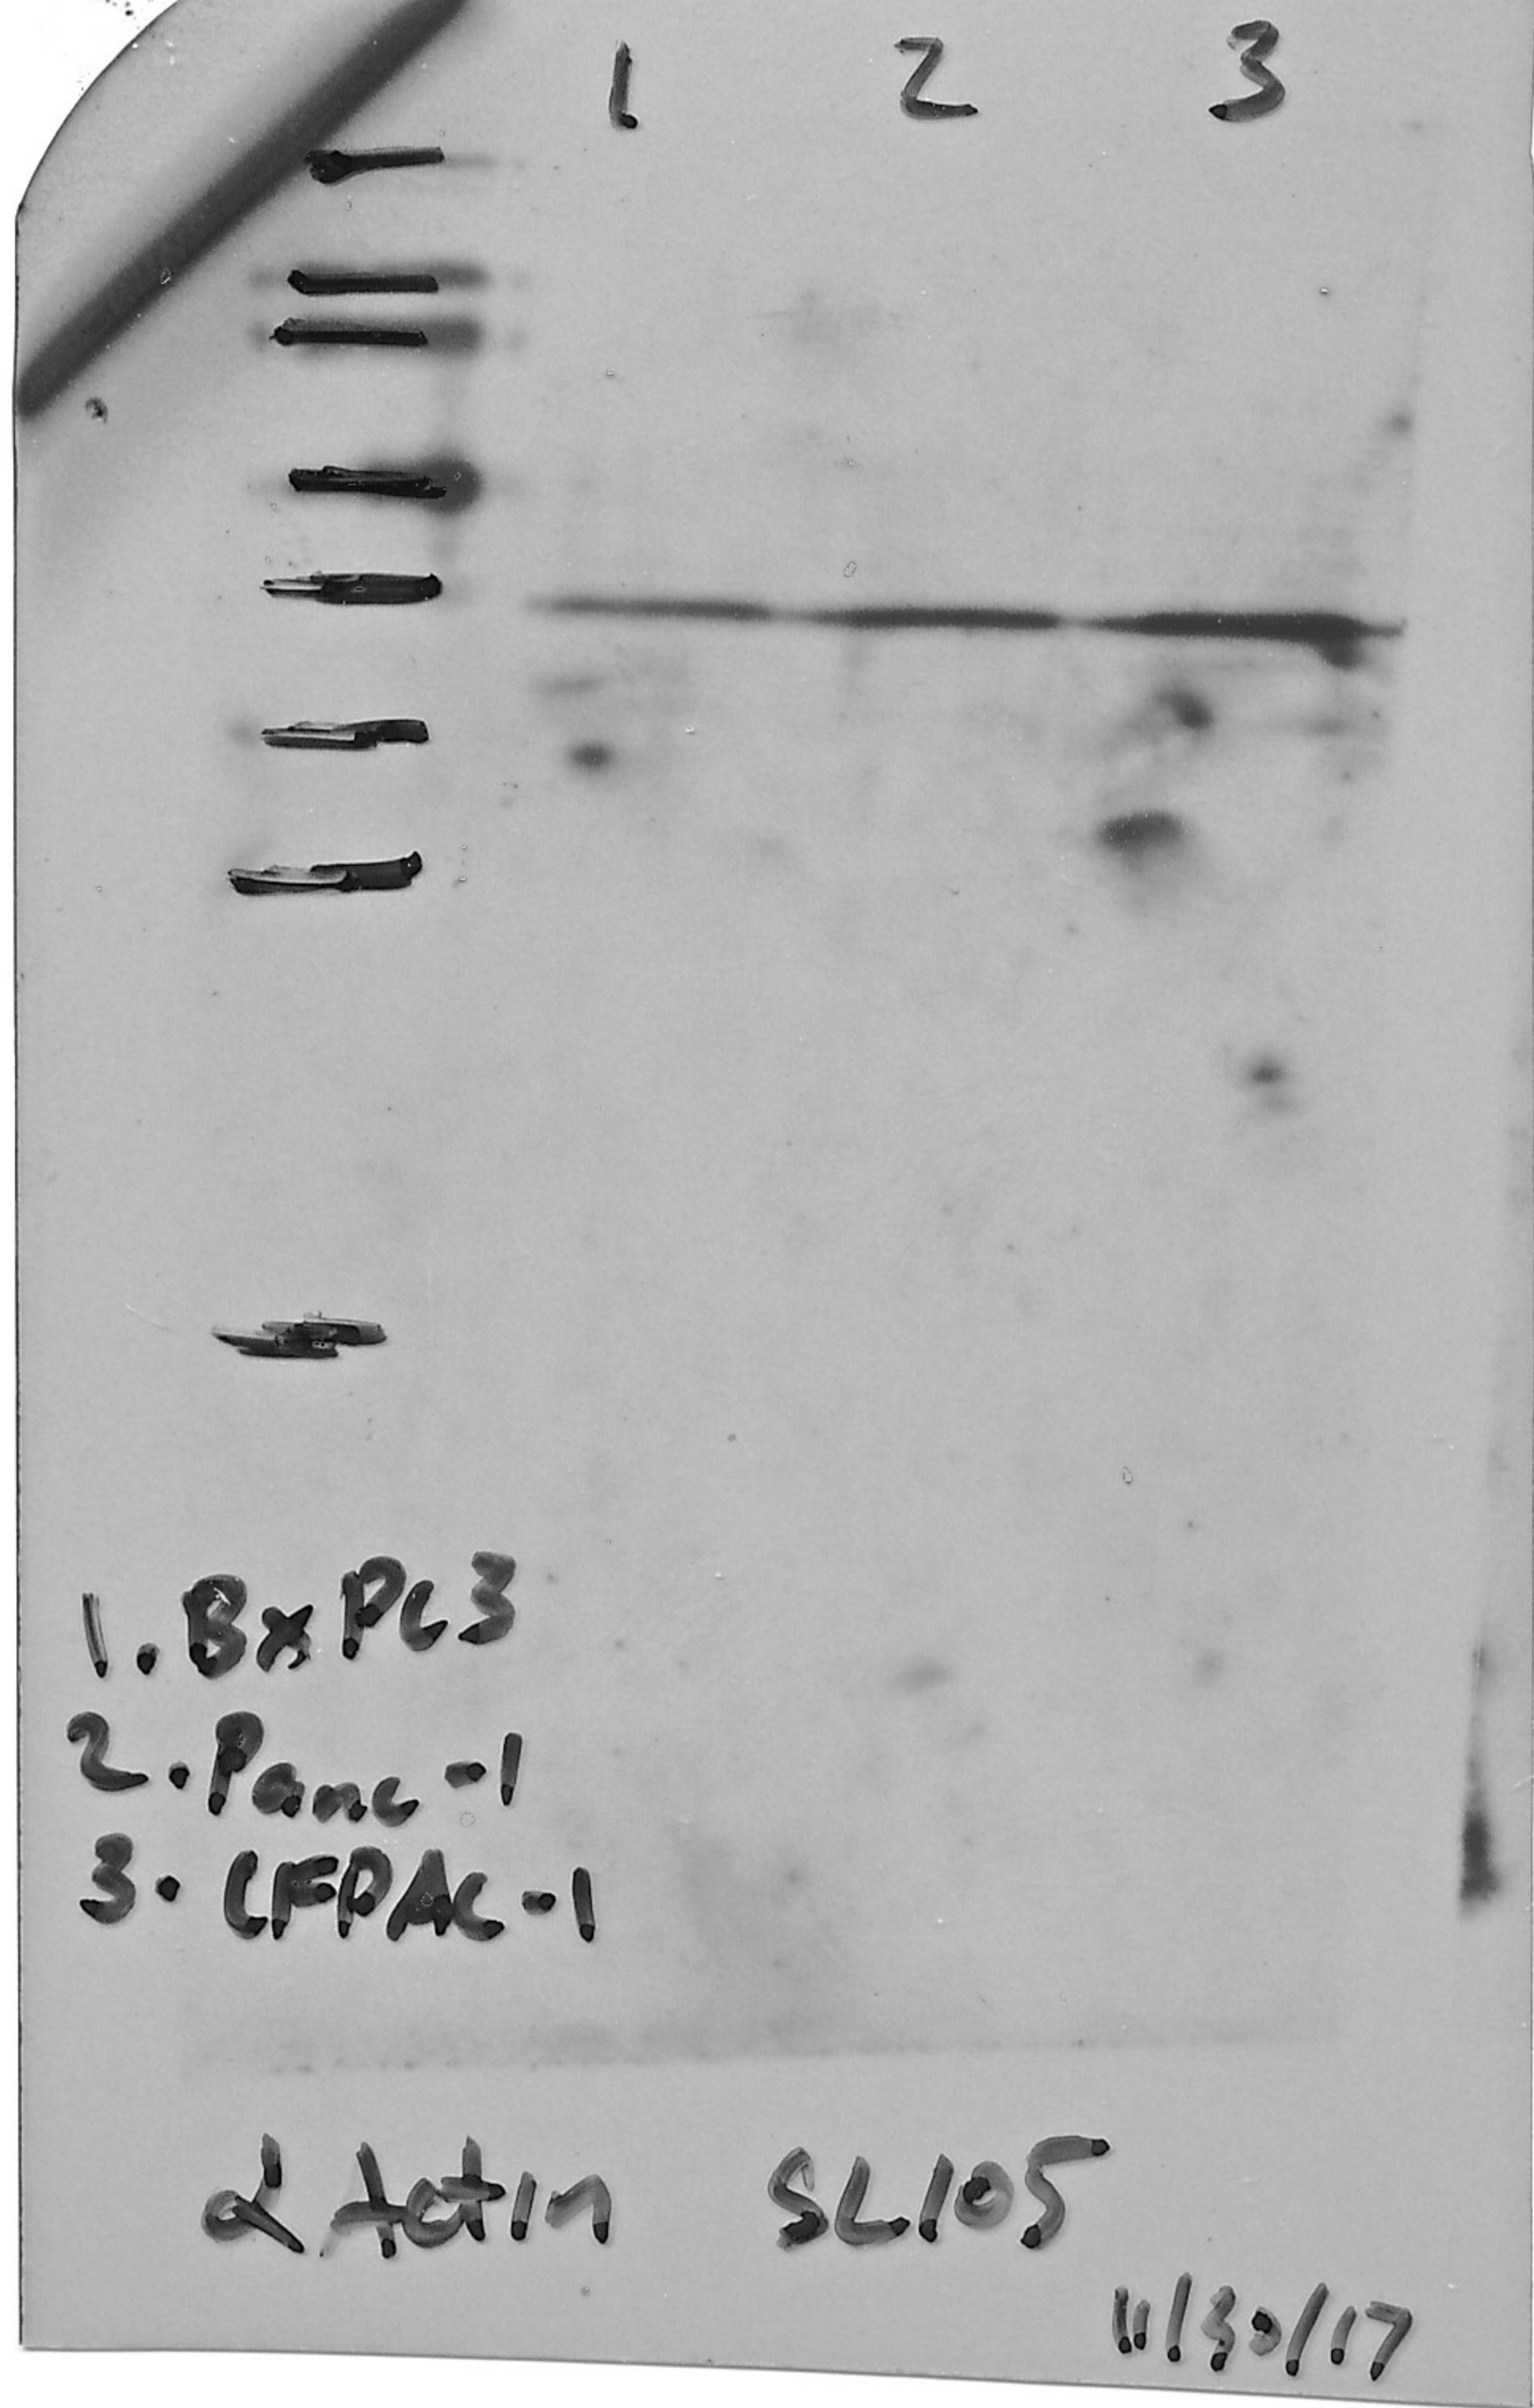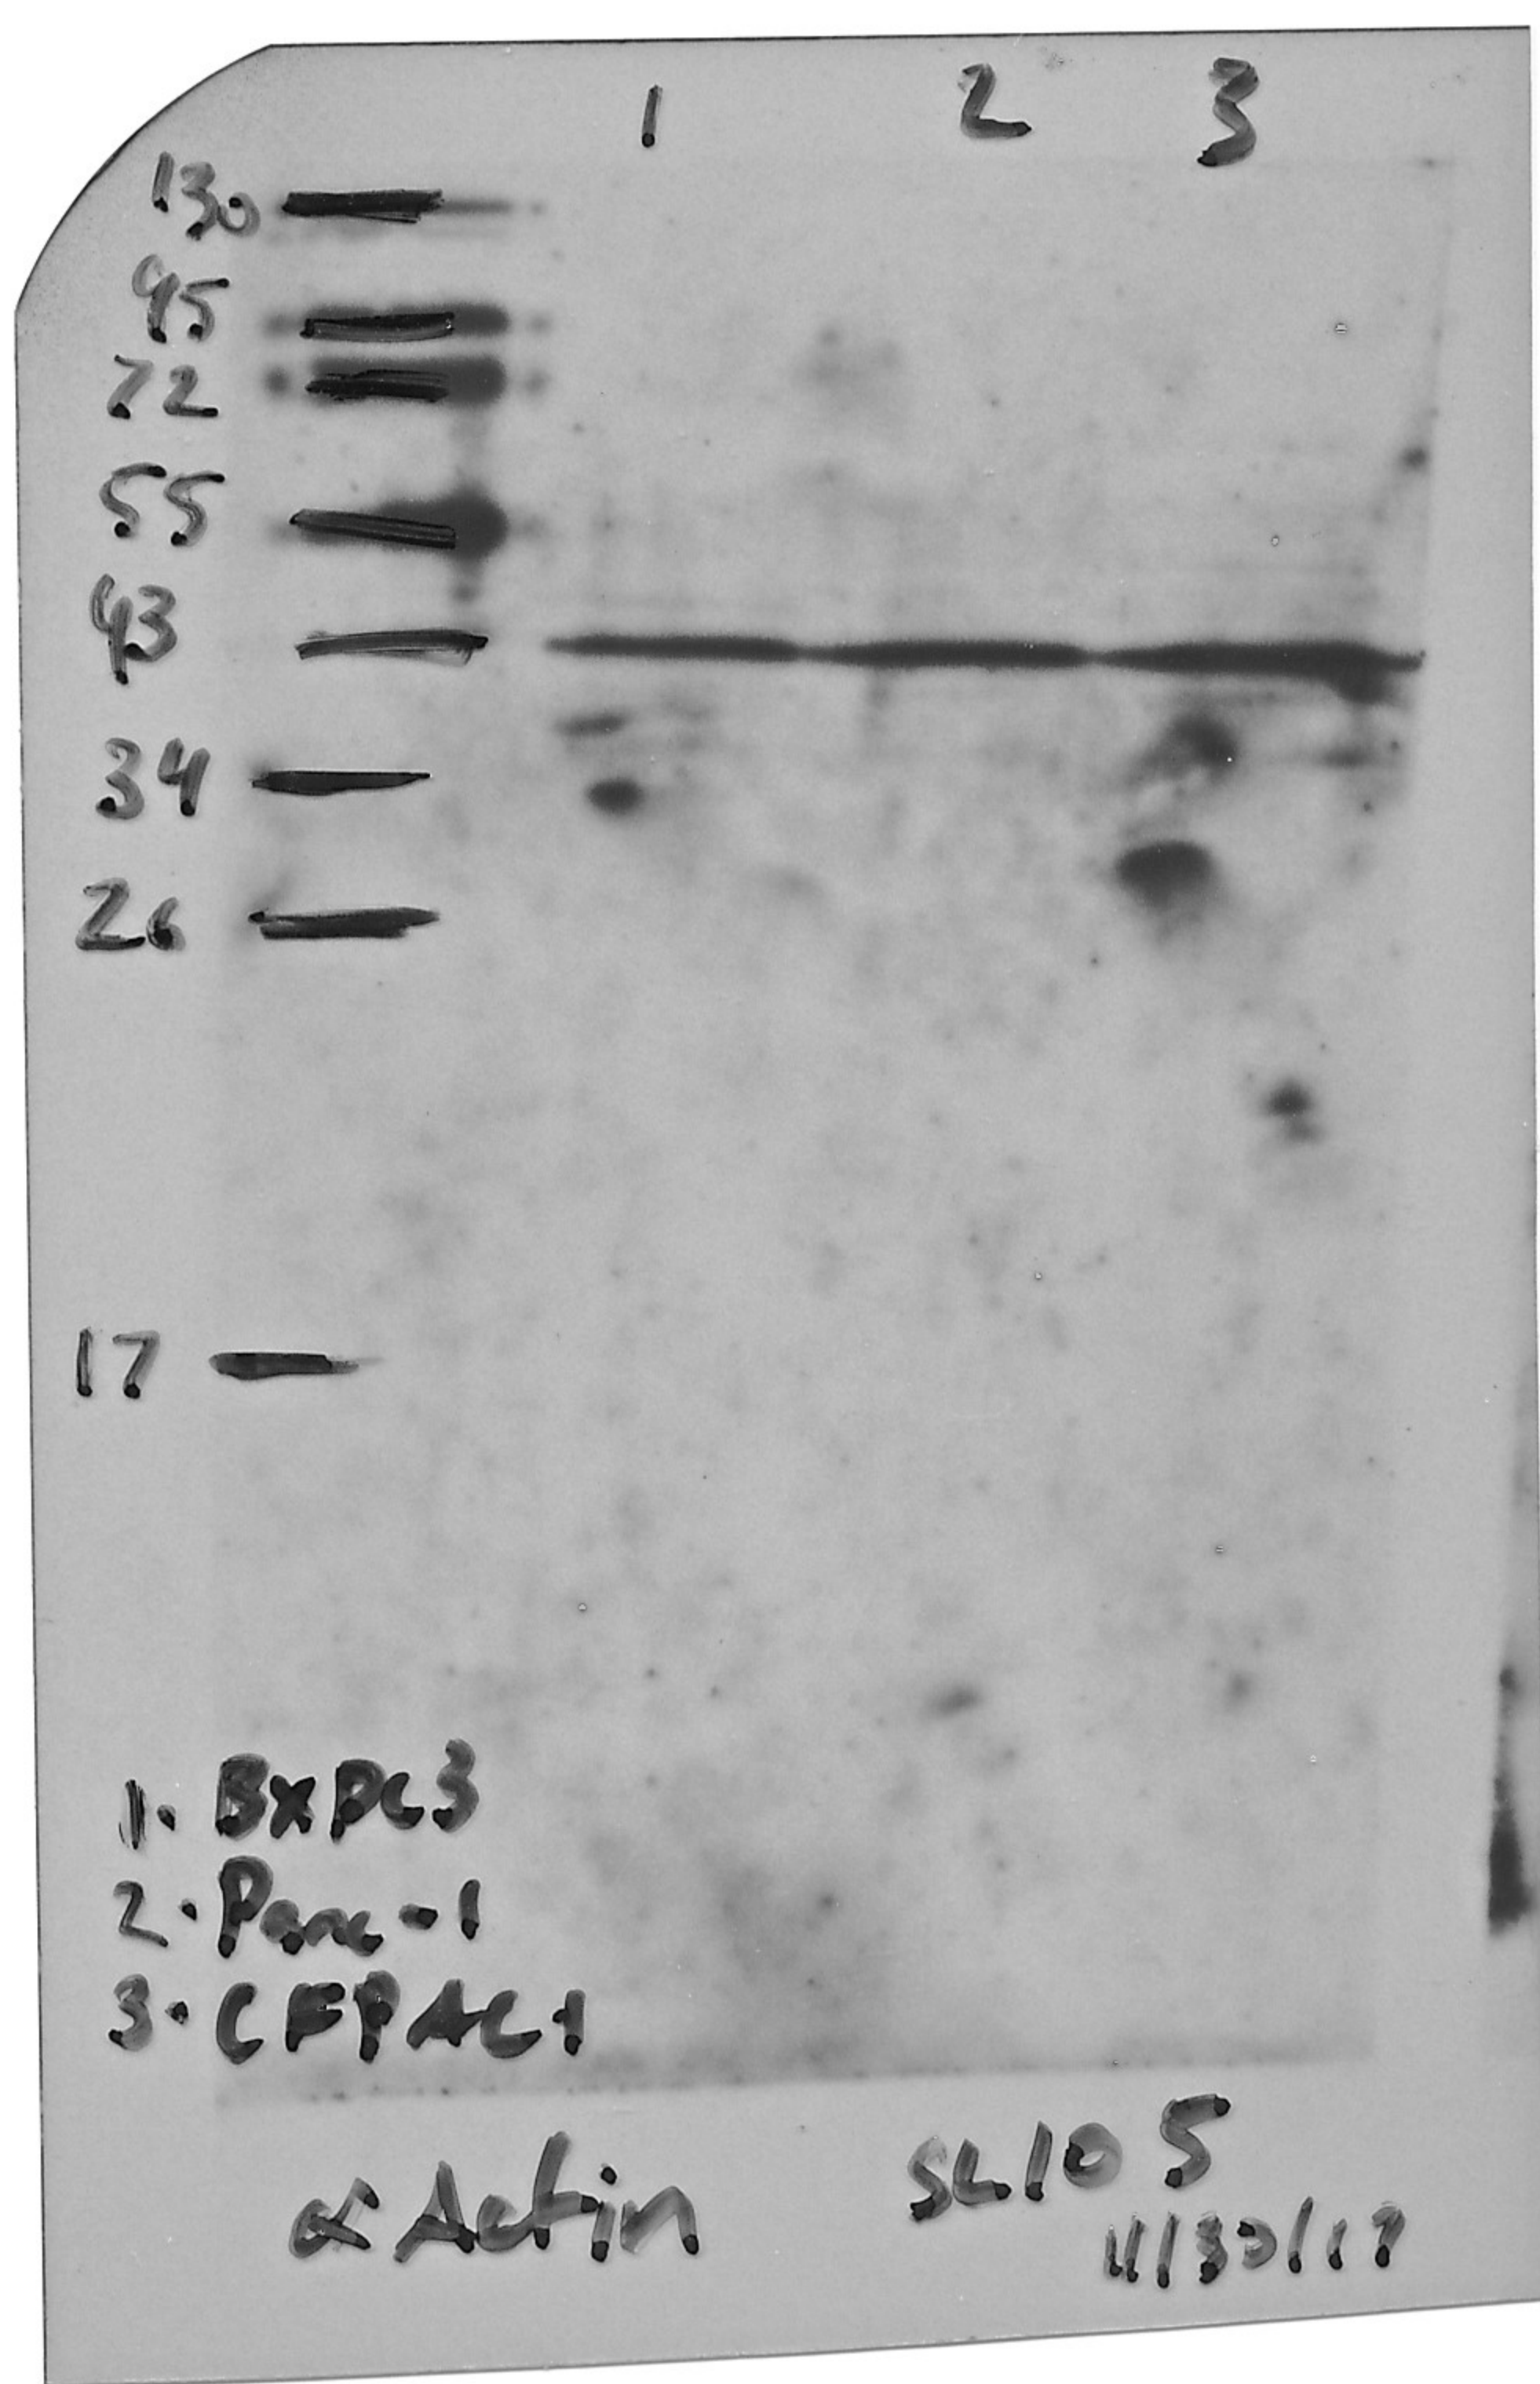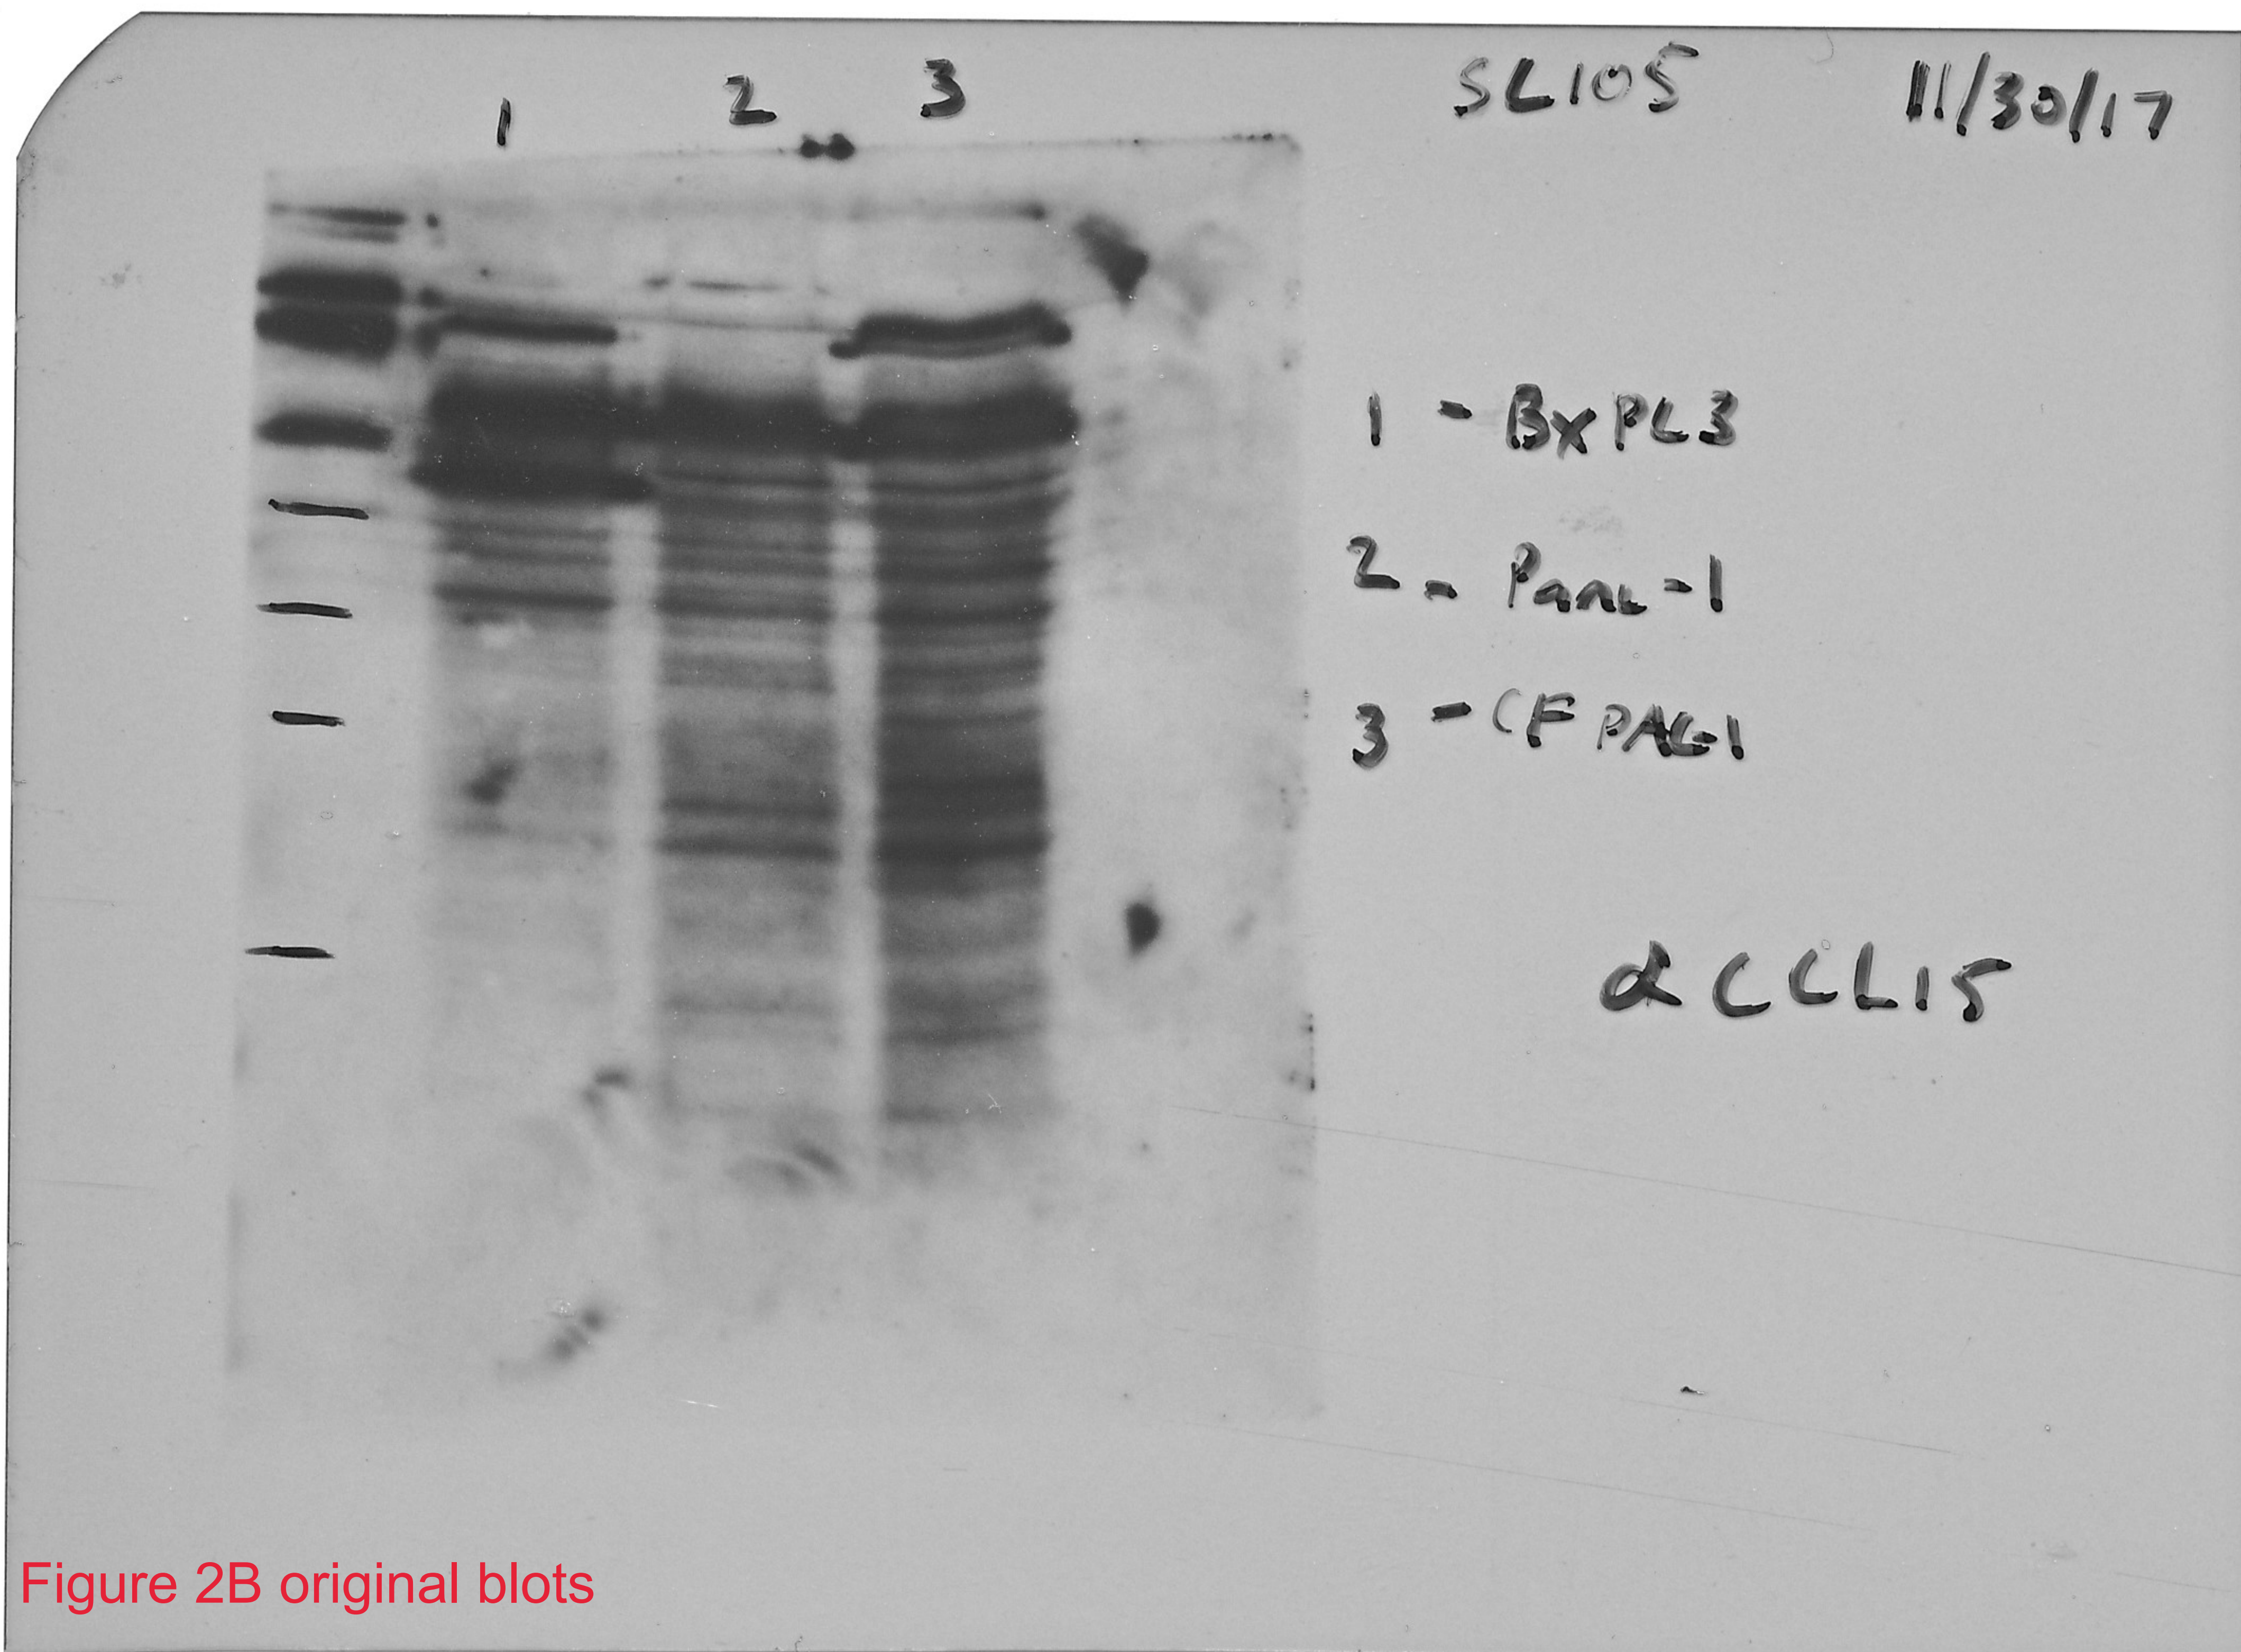

Figure 2B original blots



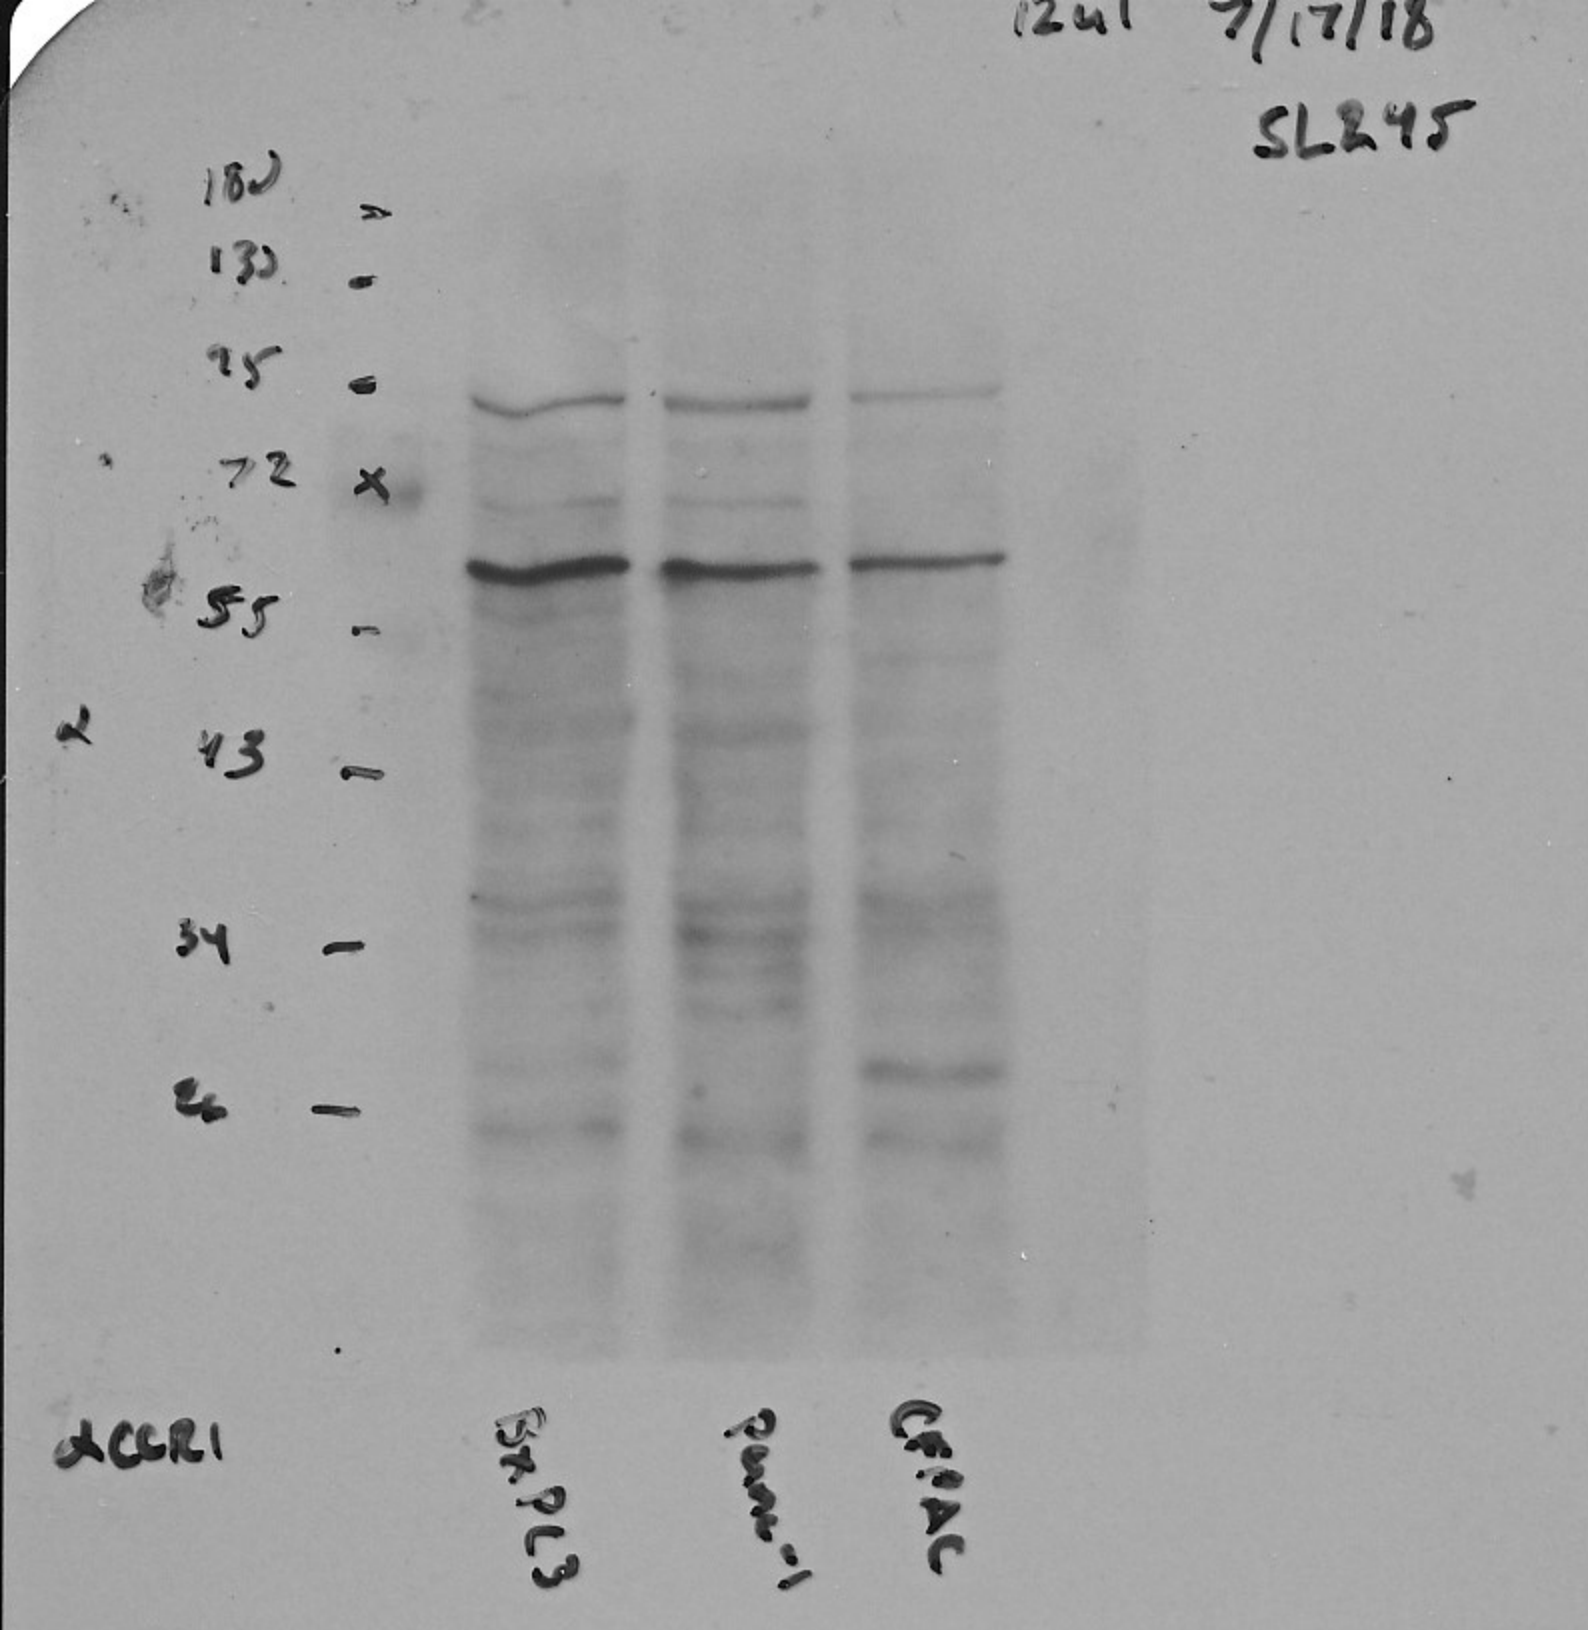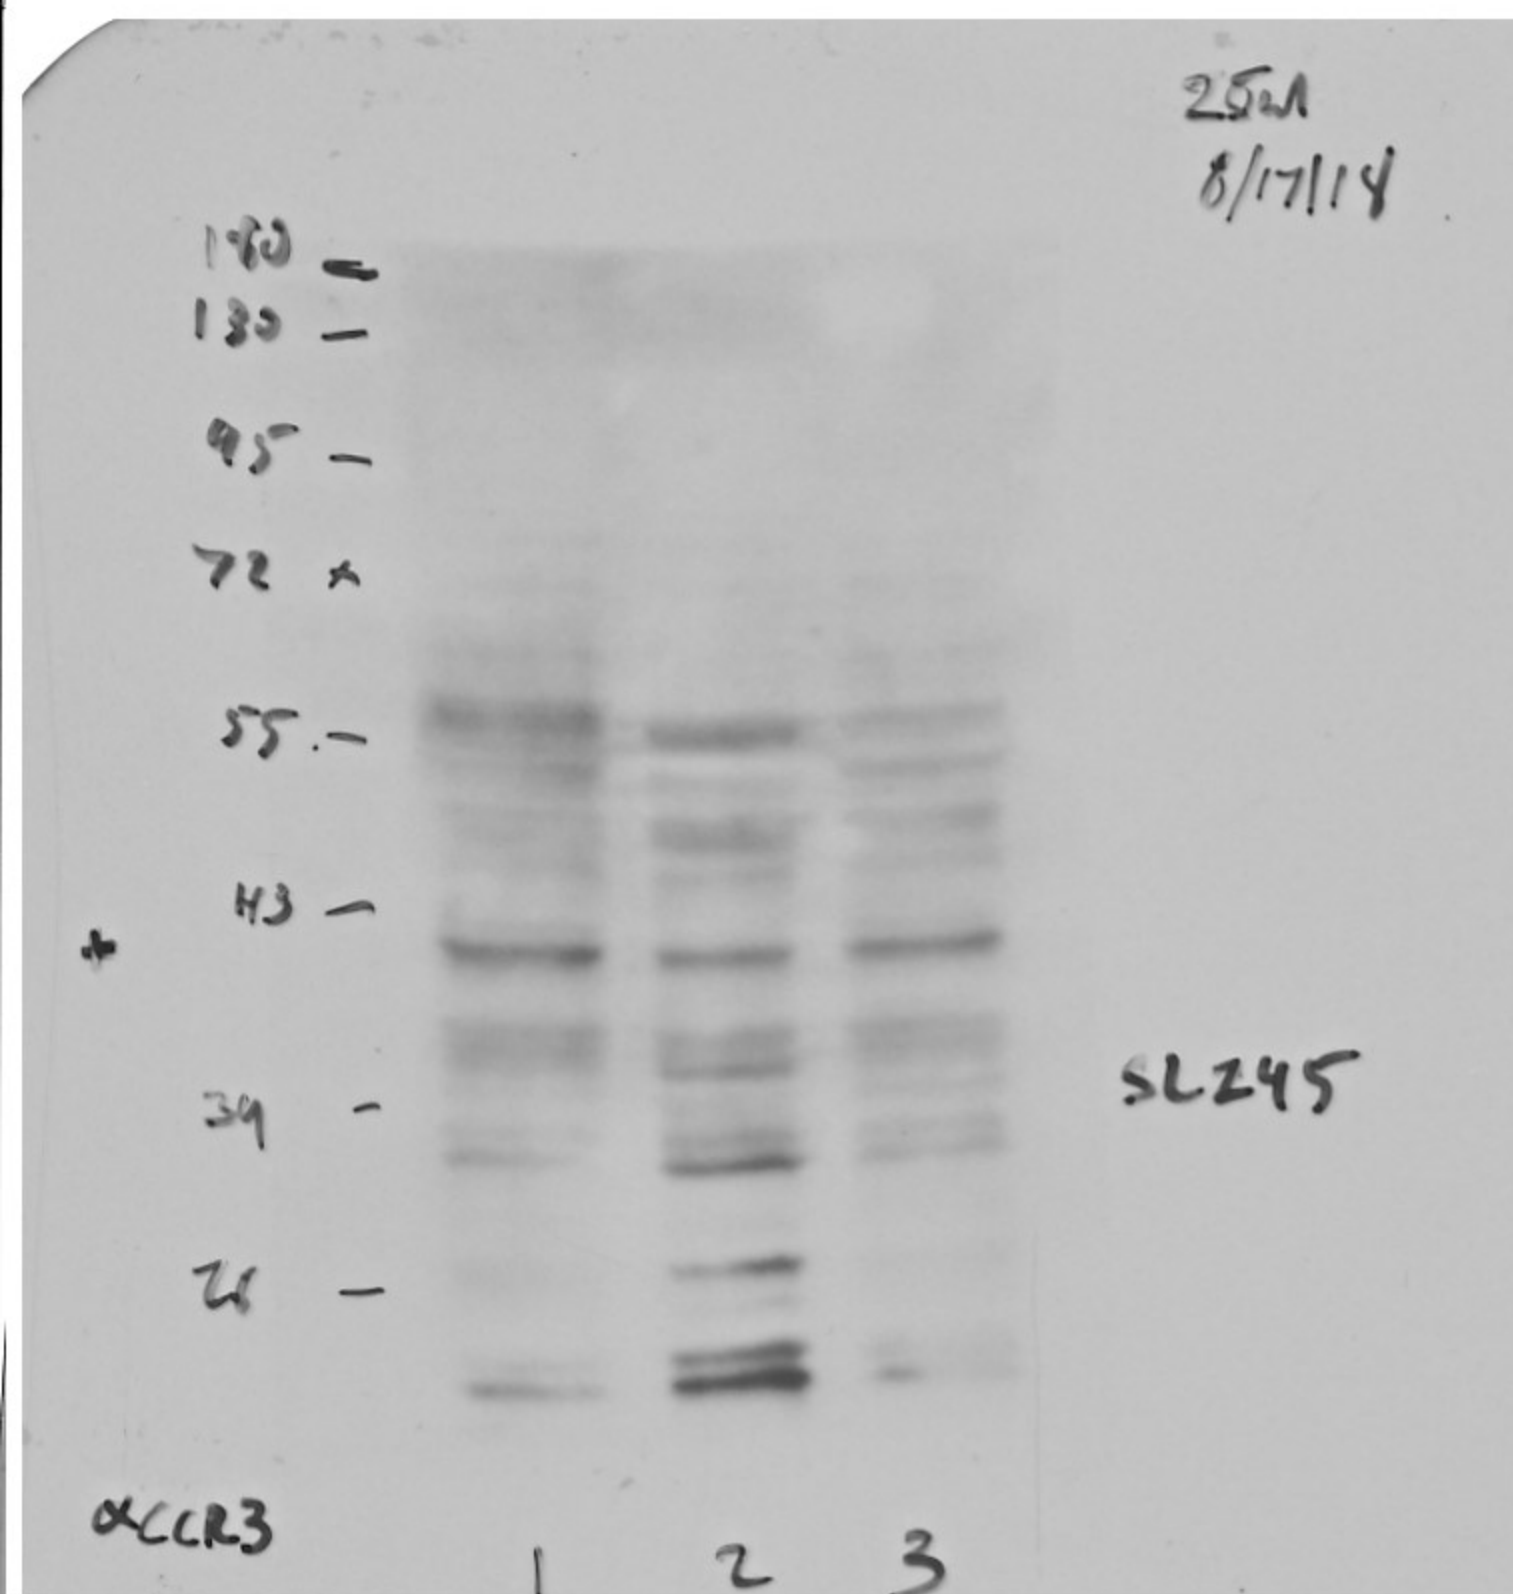

Figure 2C  
original  
blots

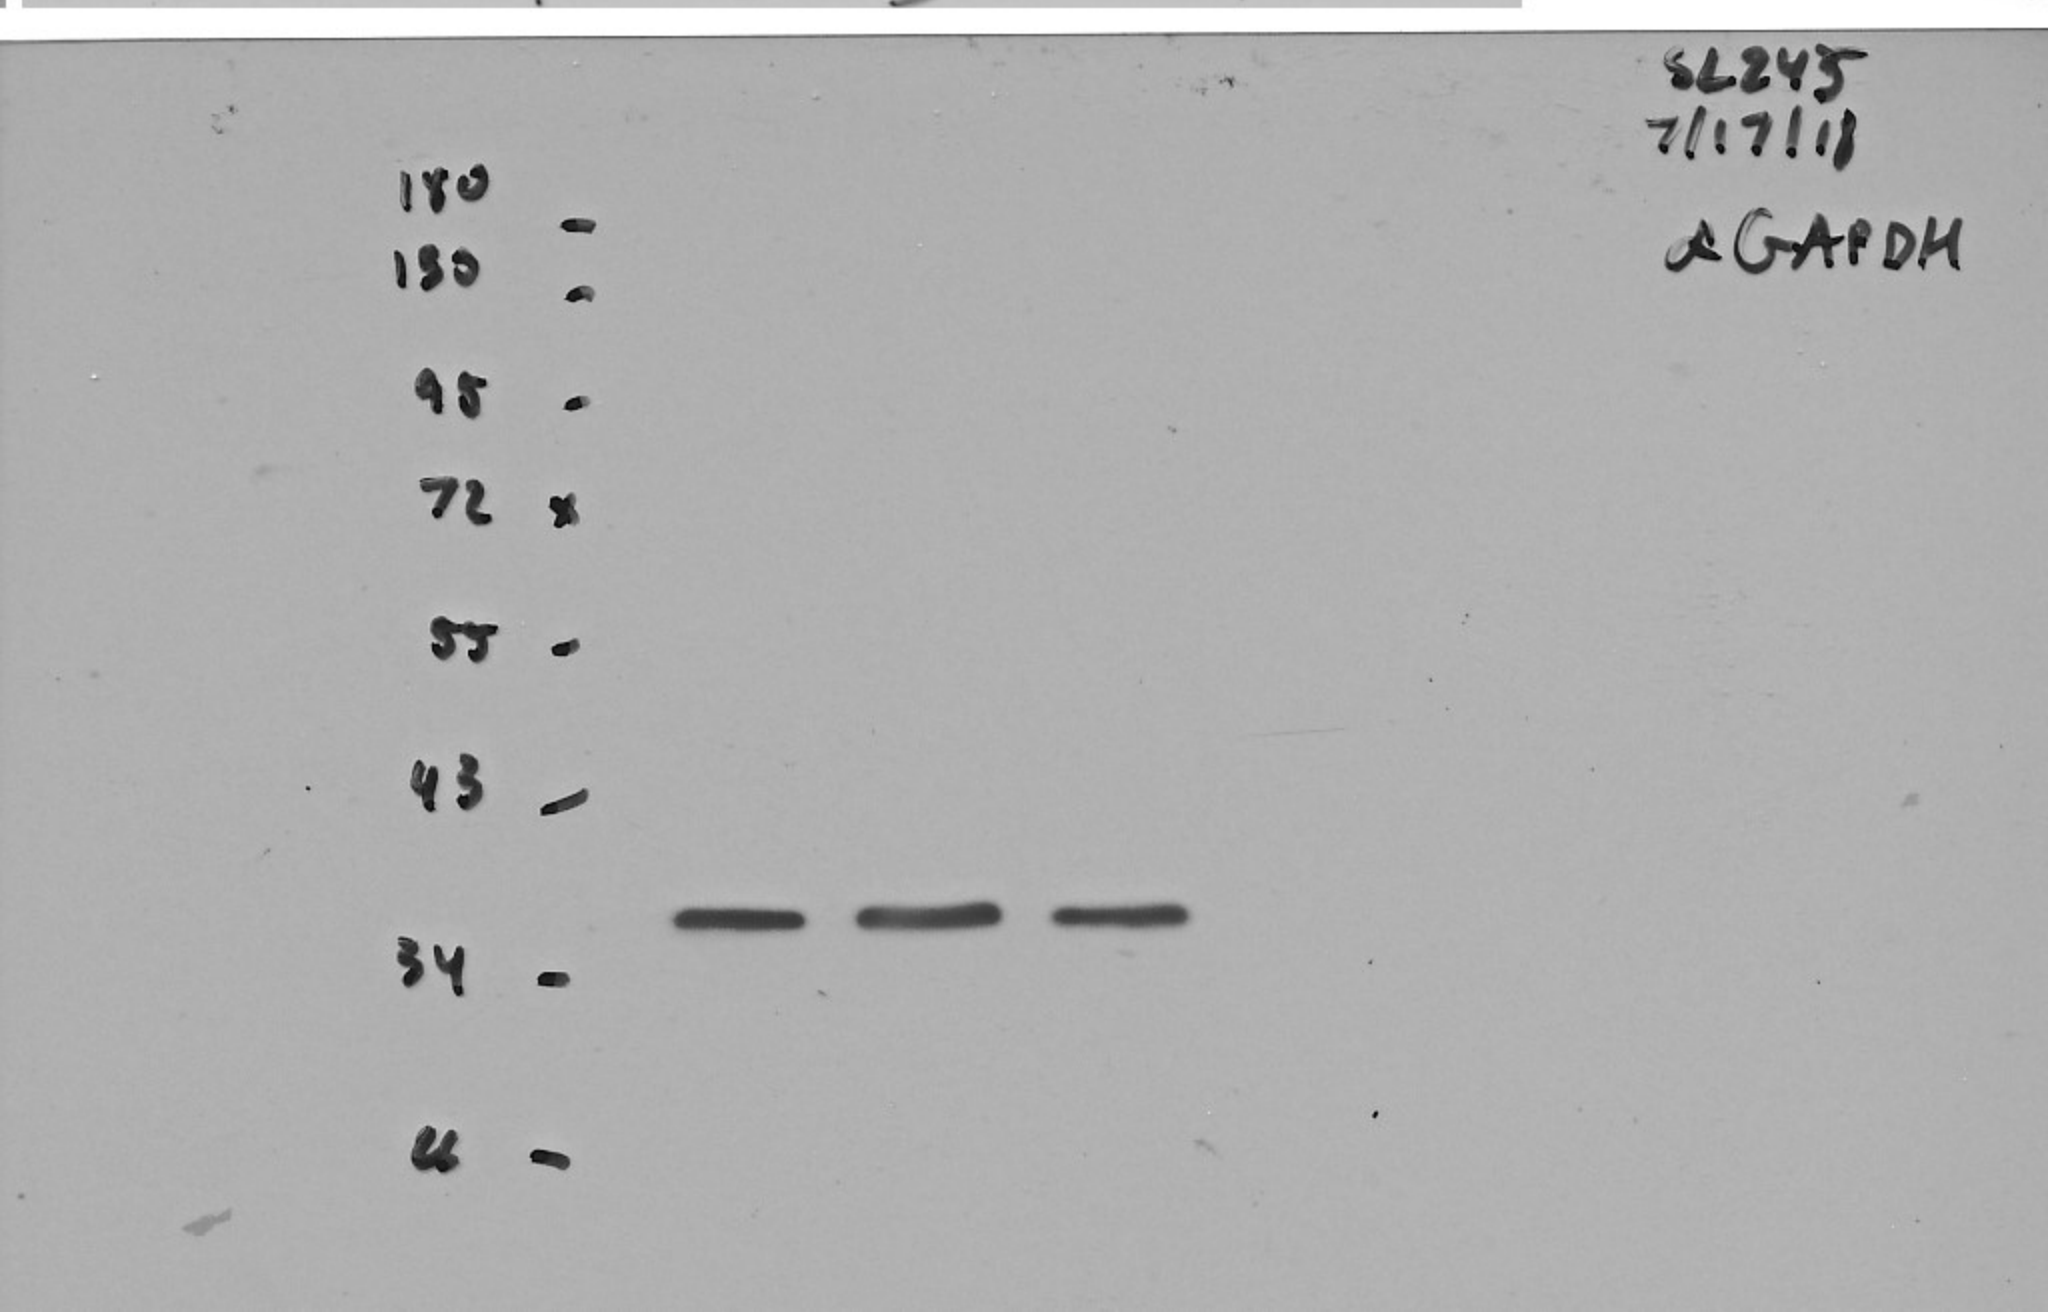

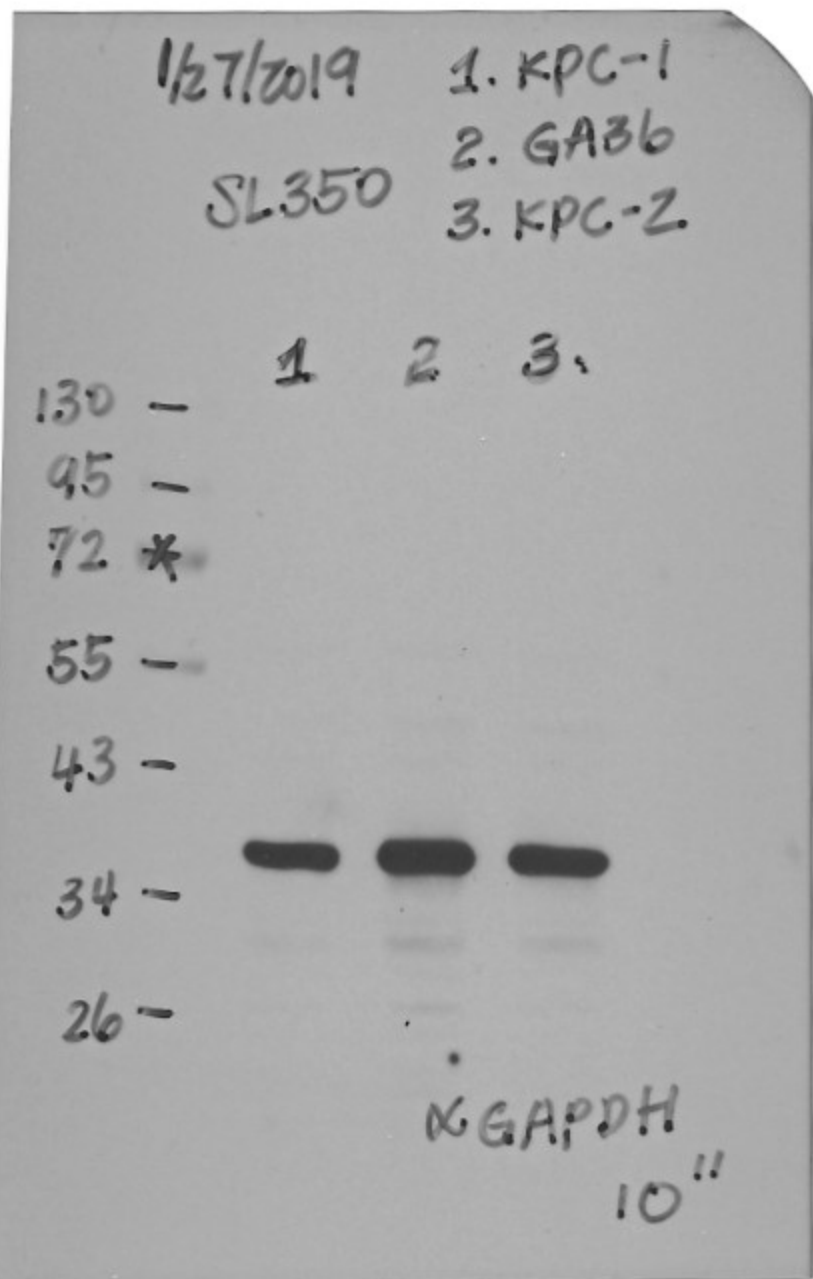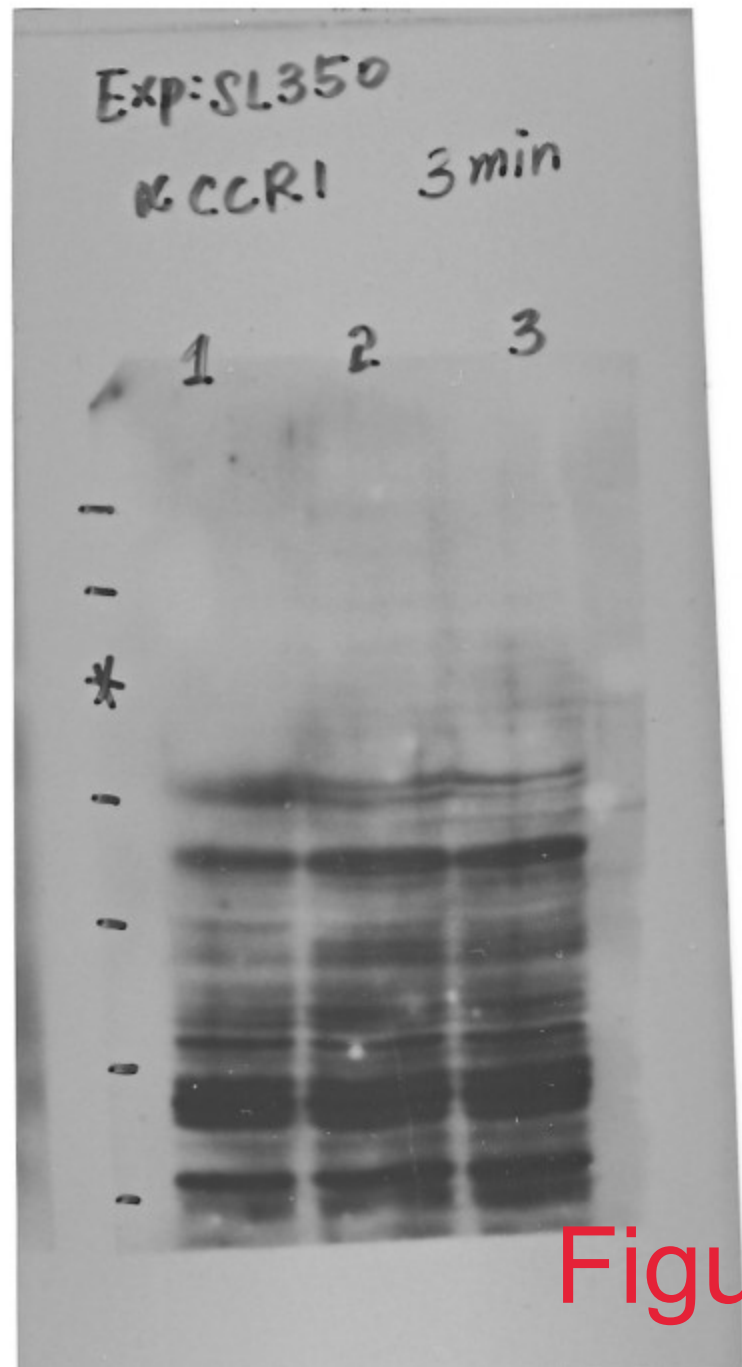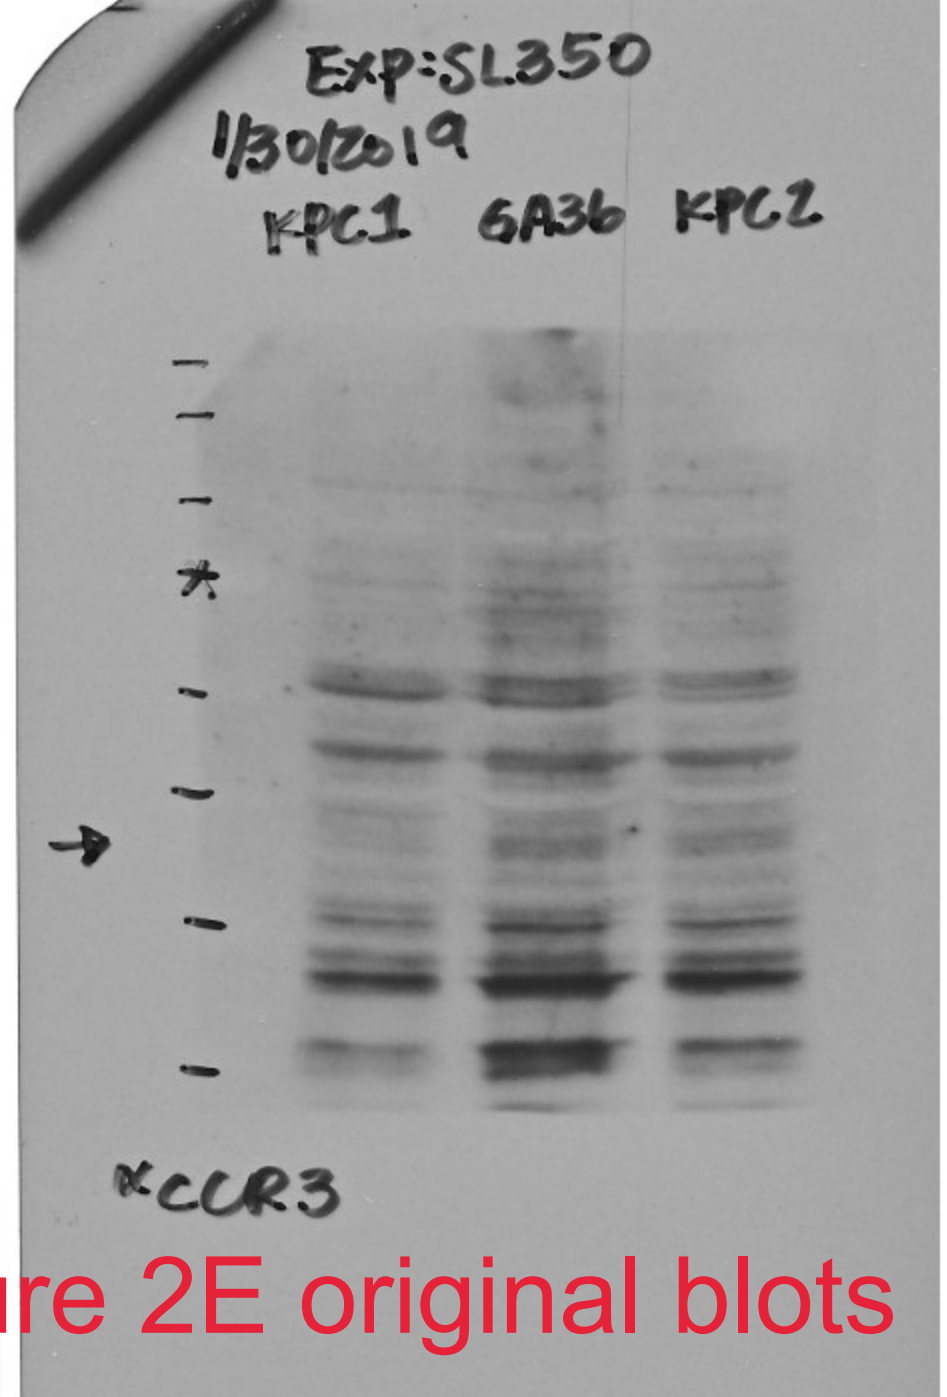

Figure 2E original blots



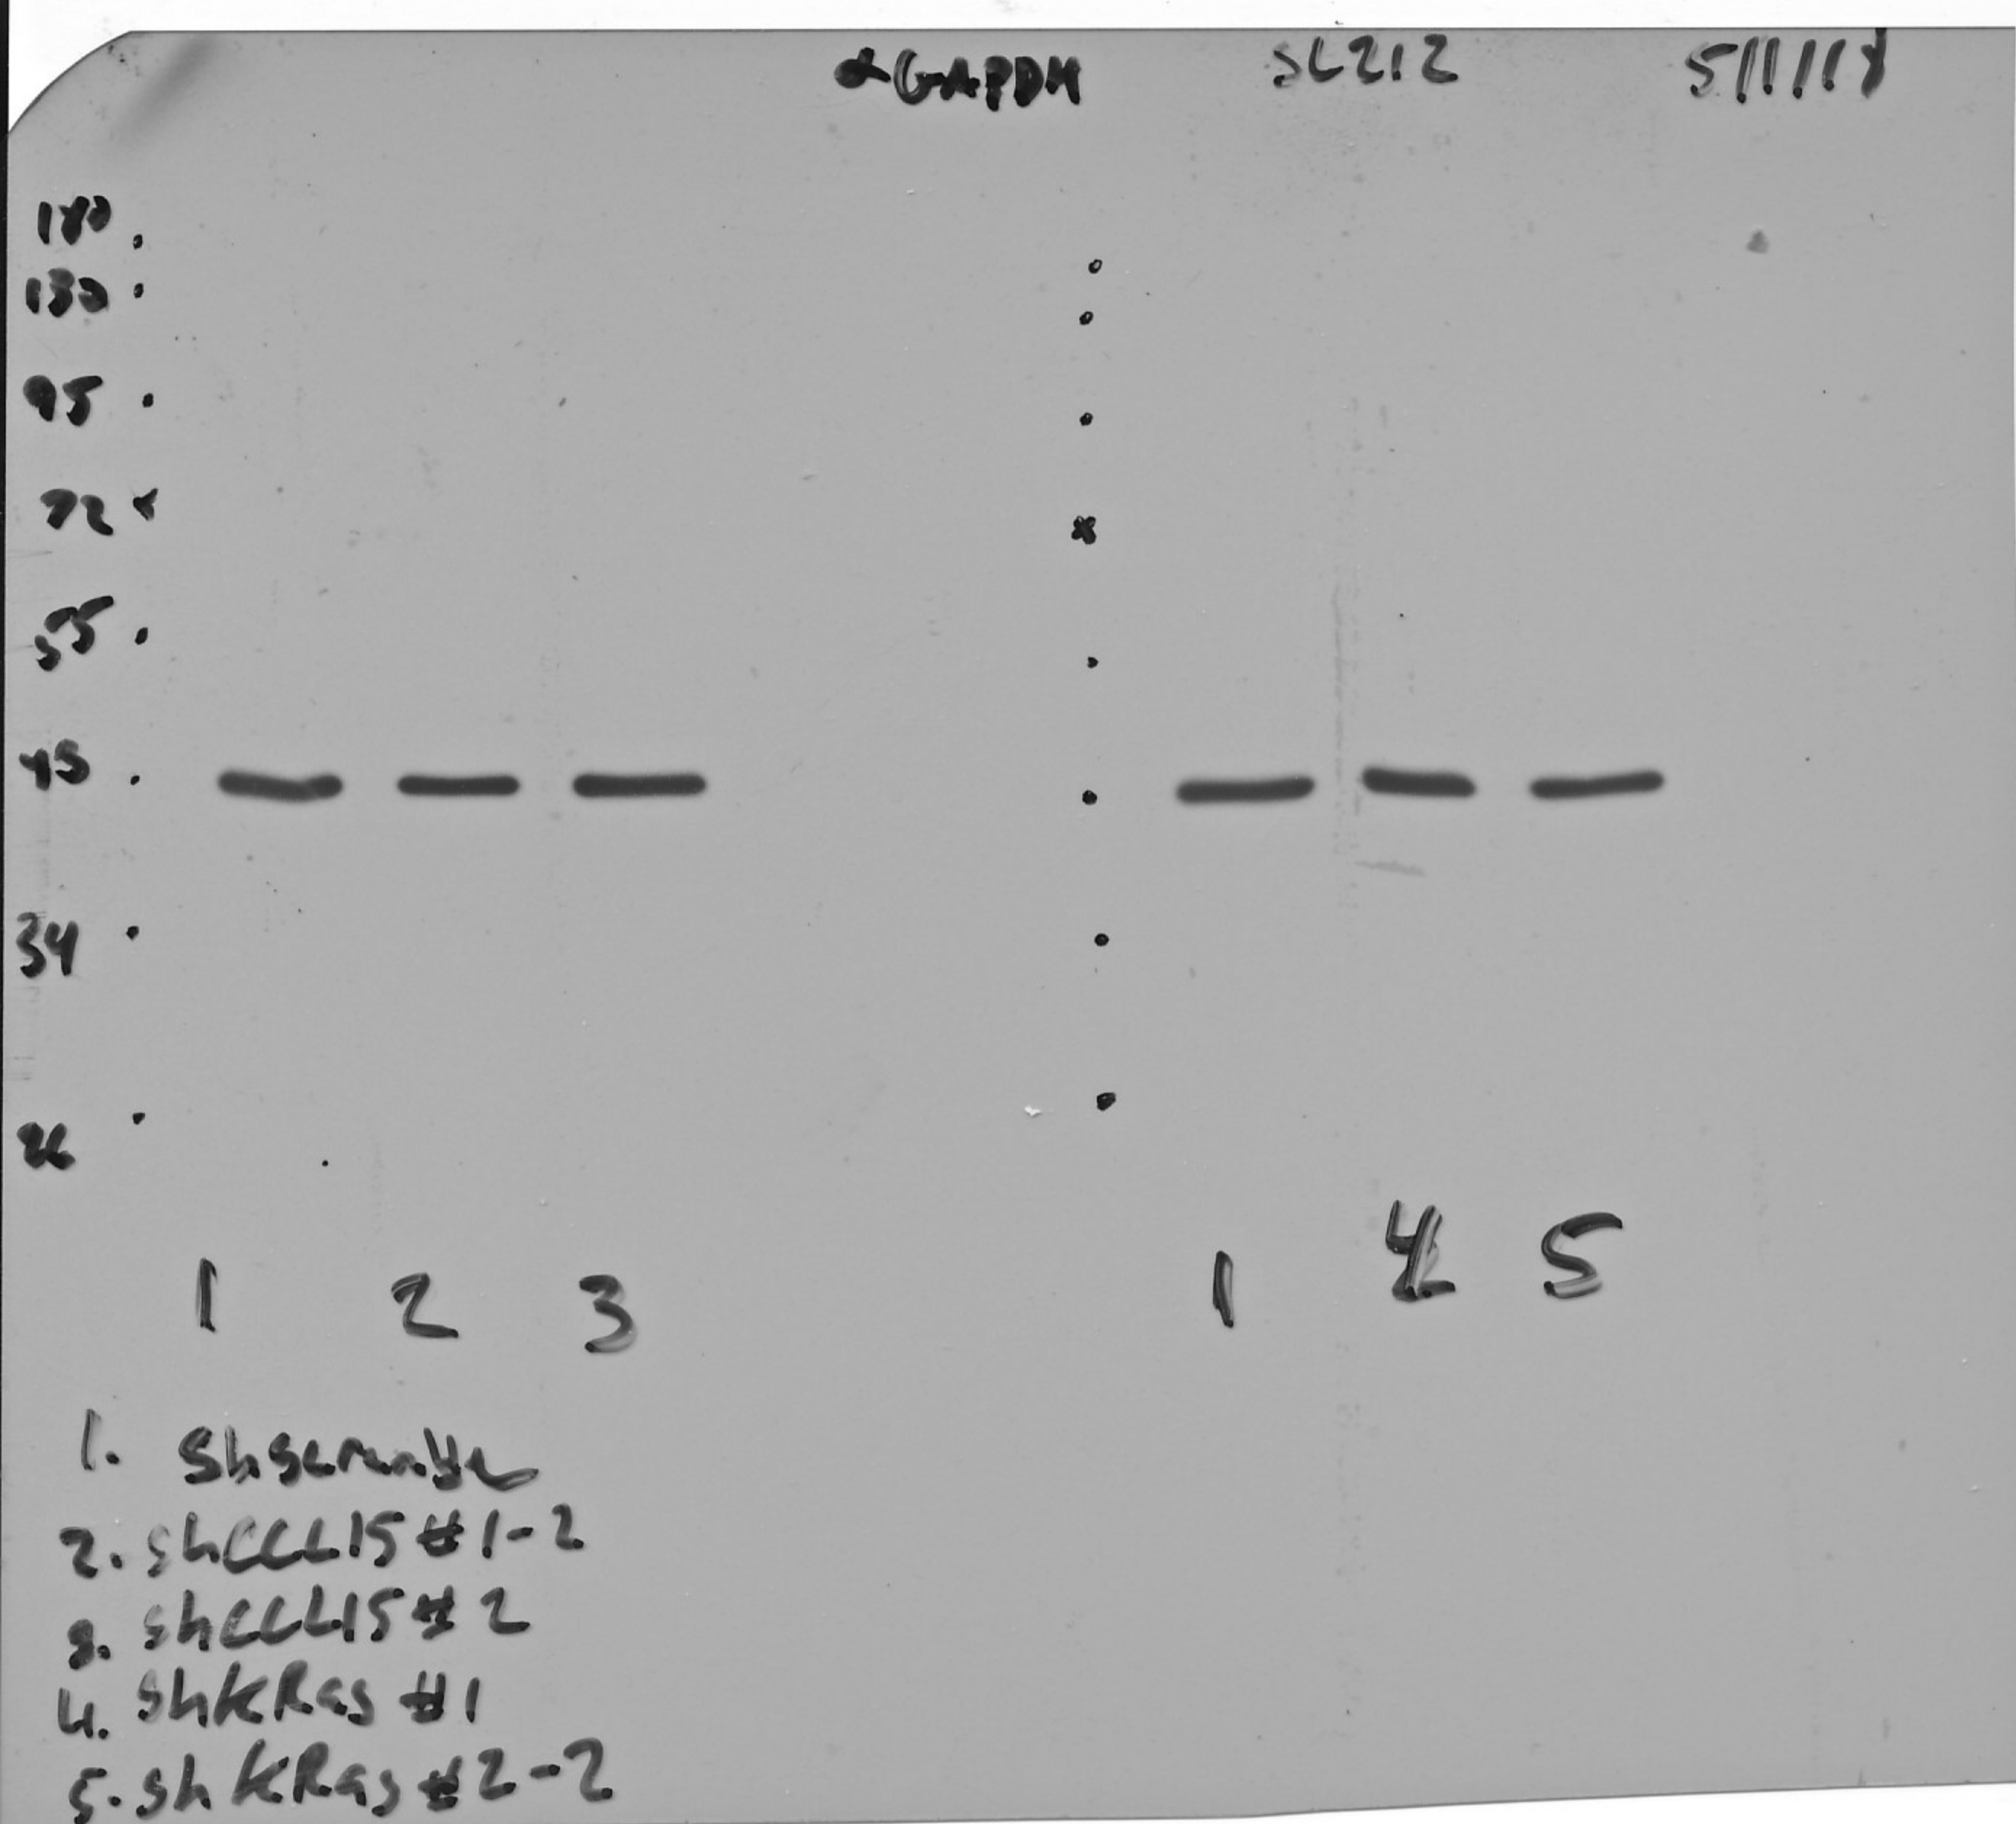

Figures 3B & 5A  
original blots

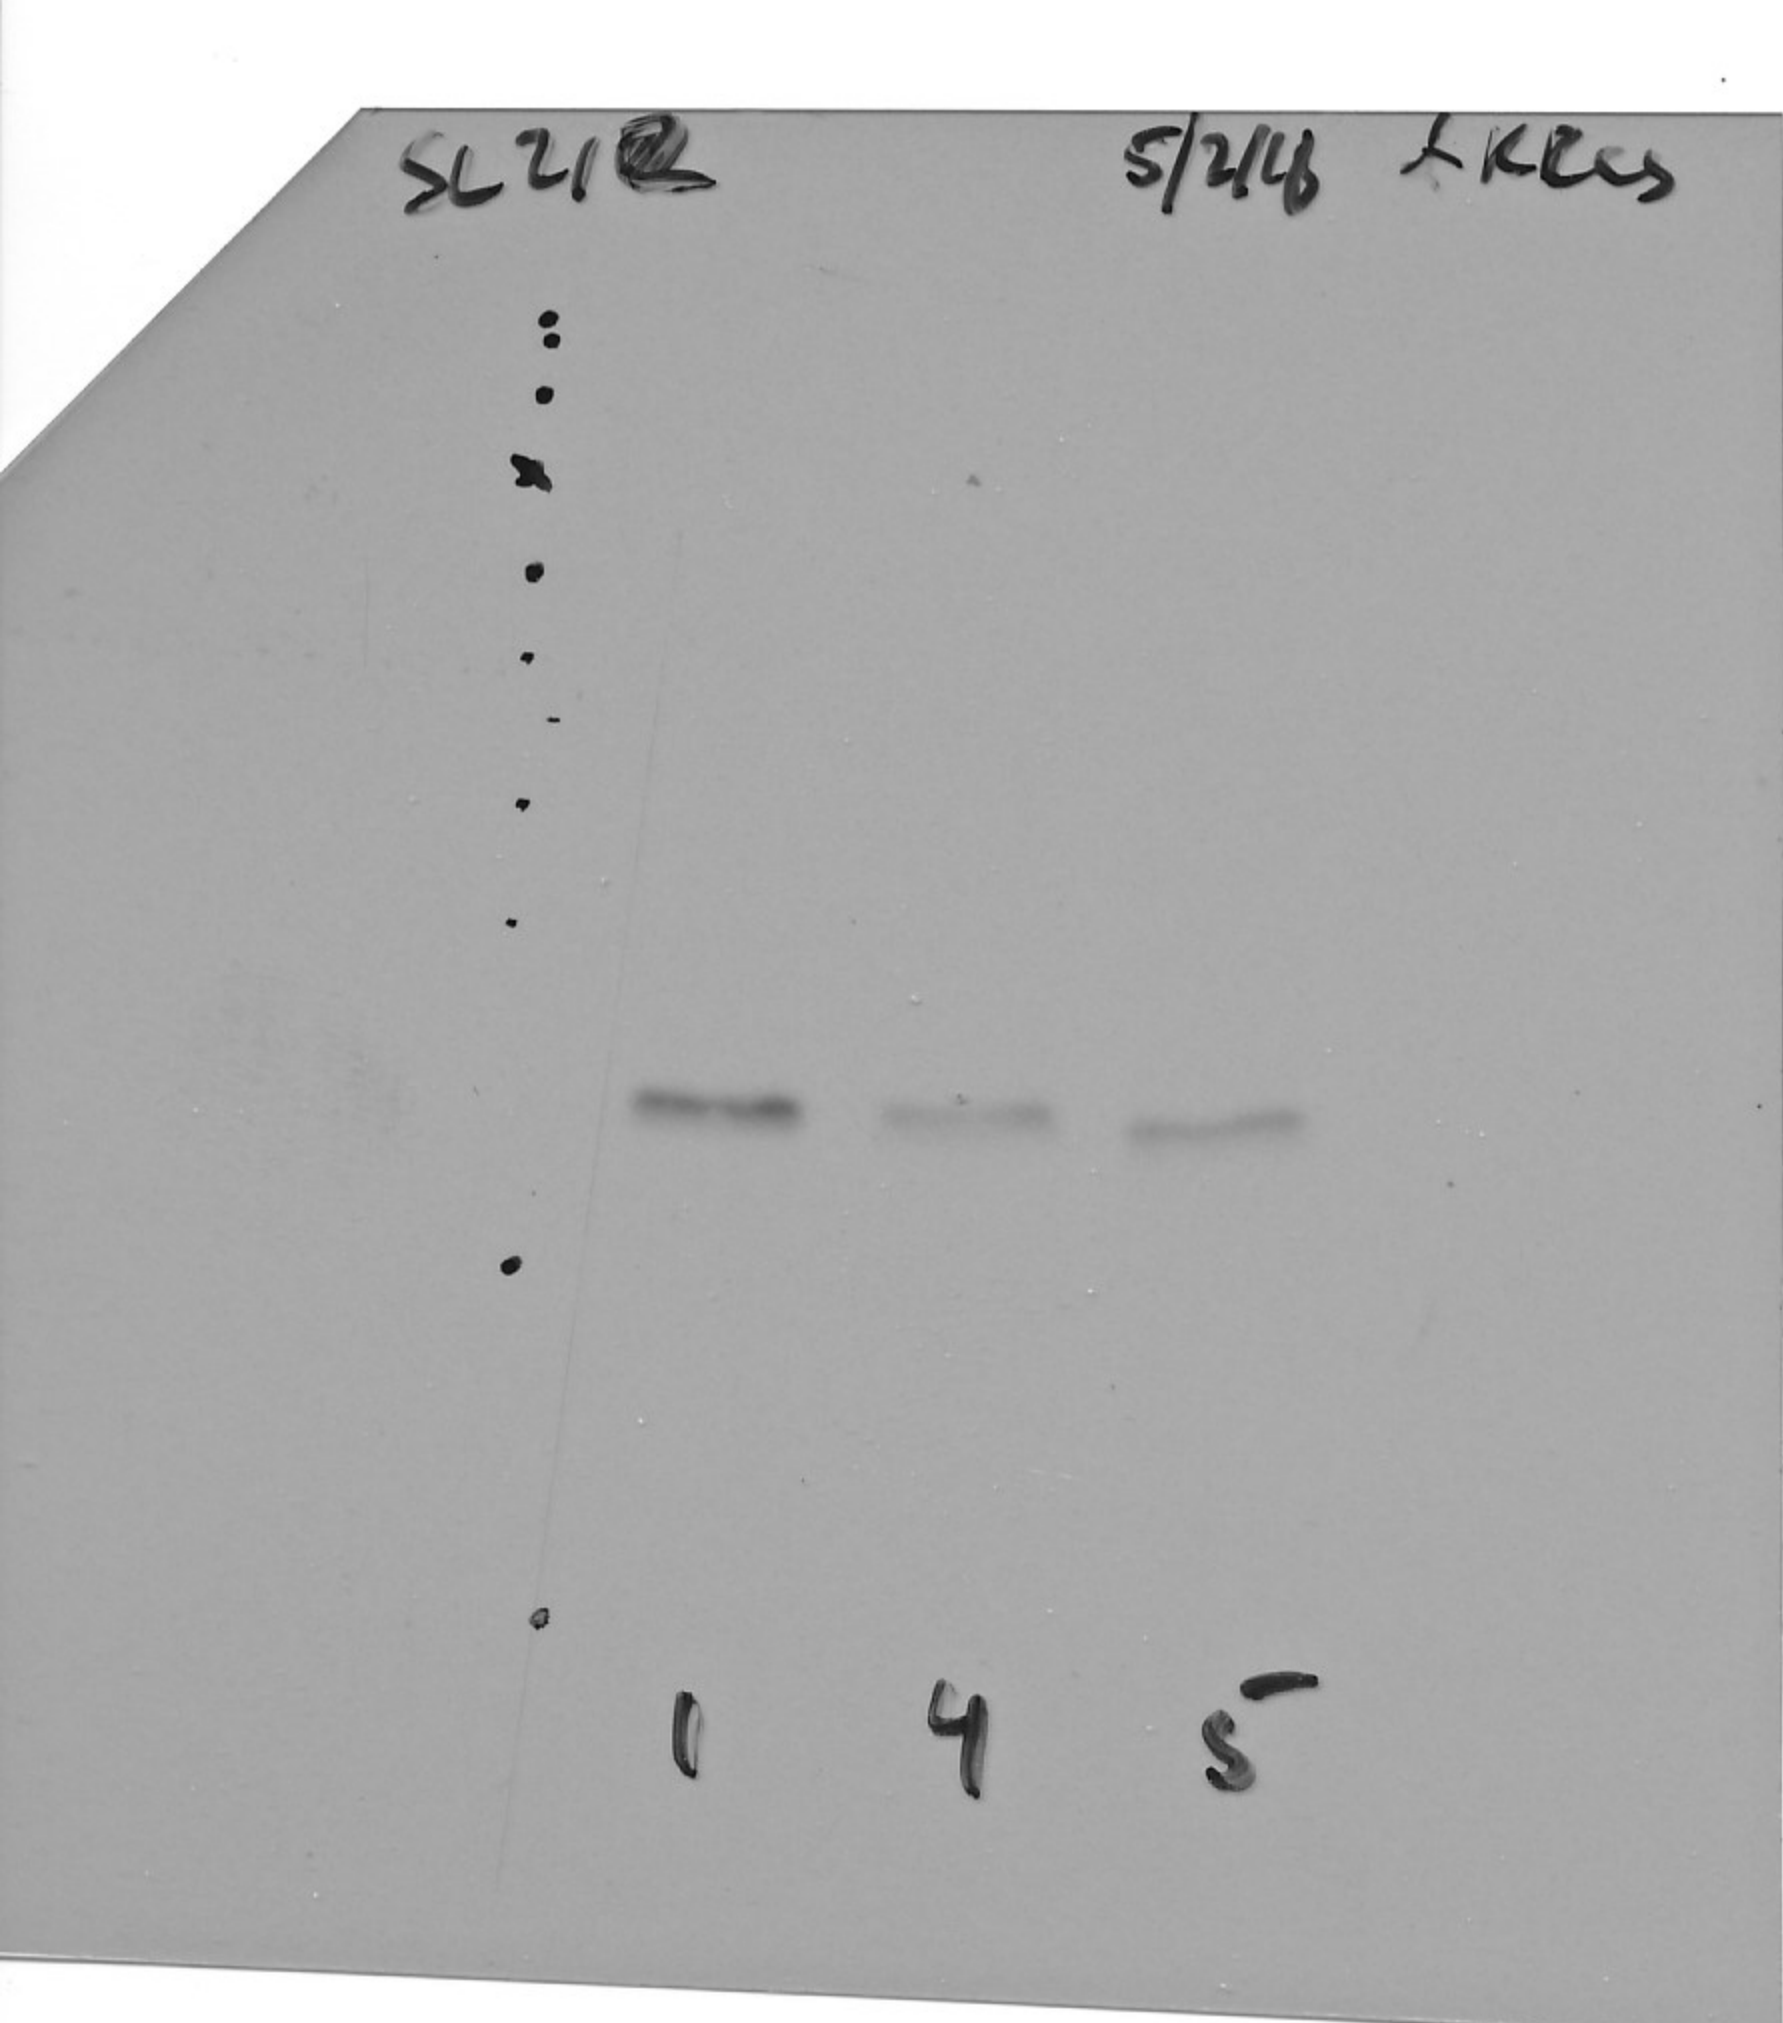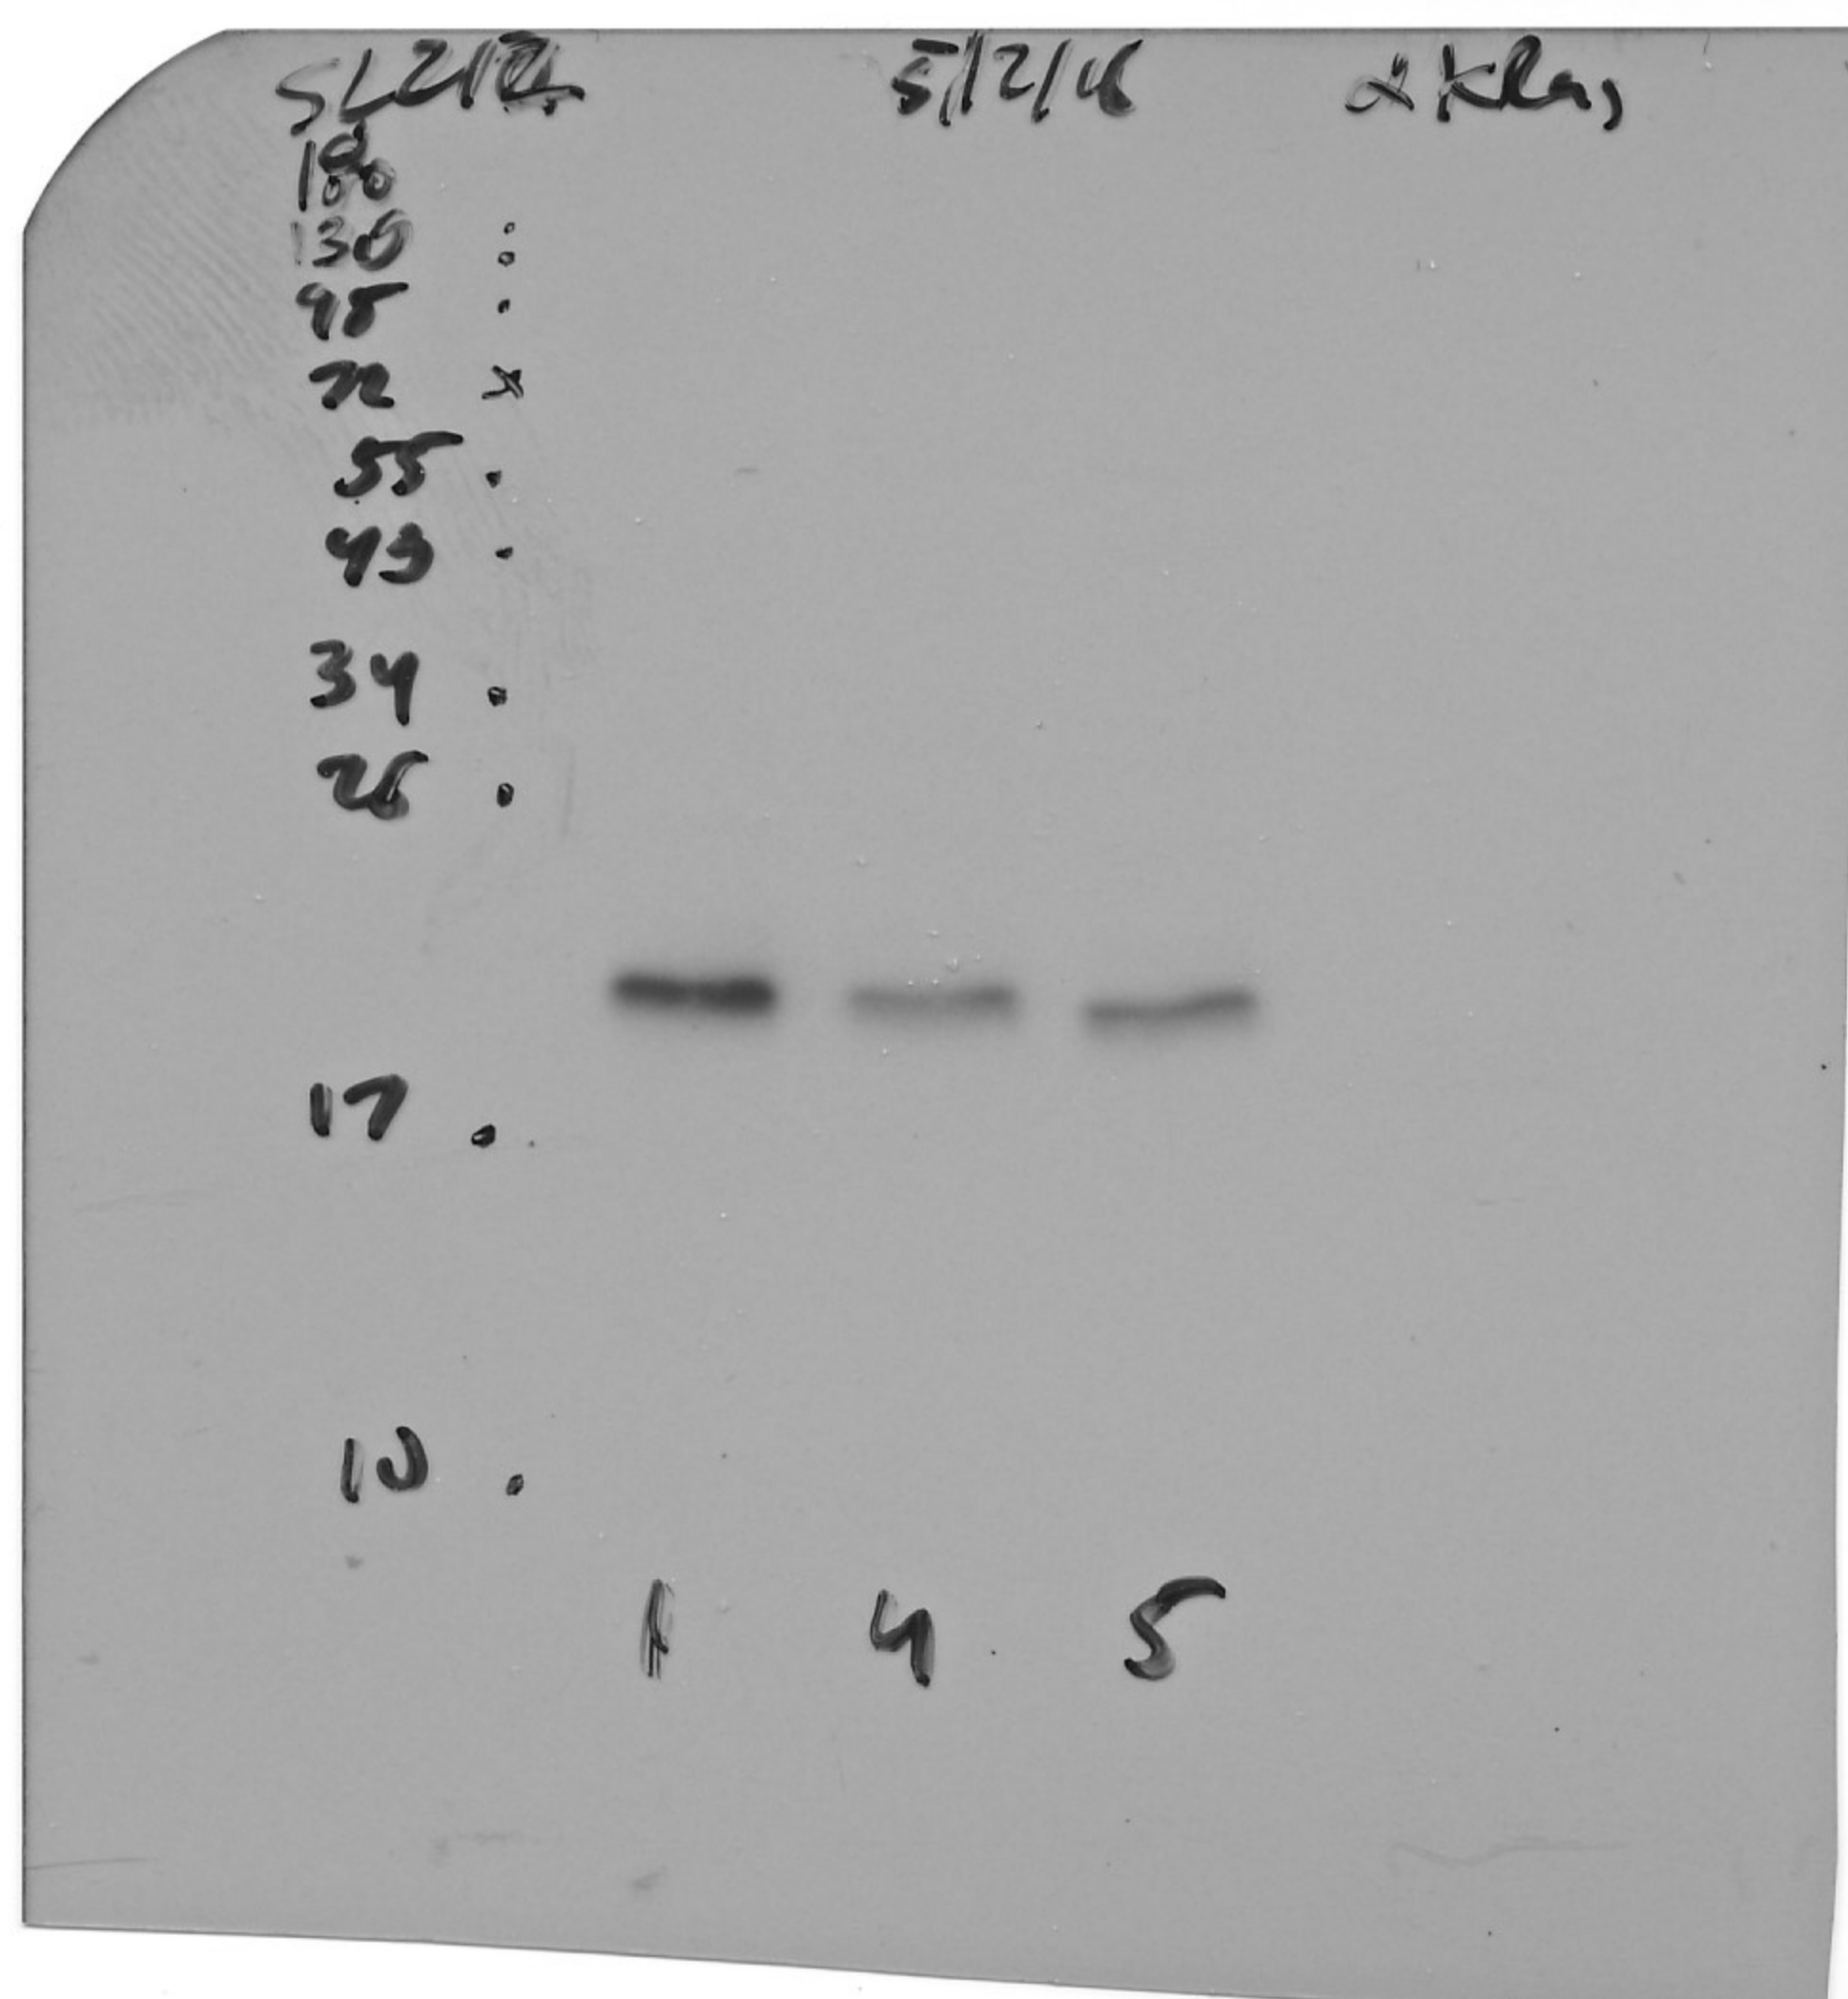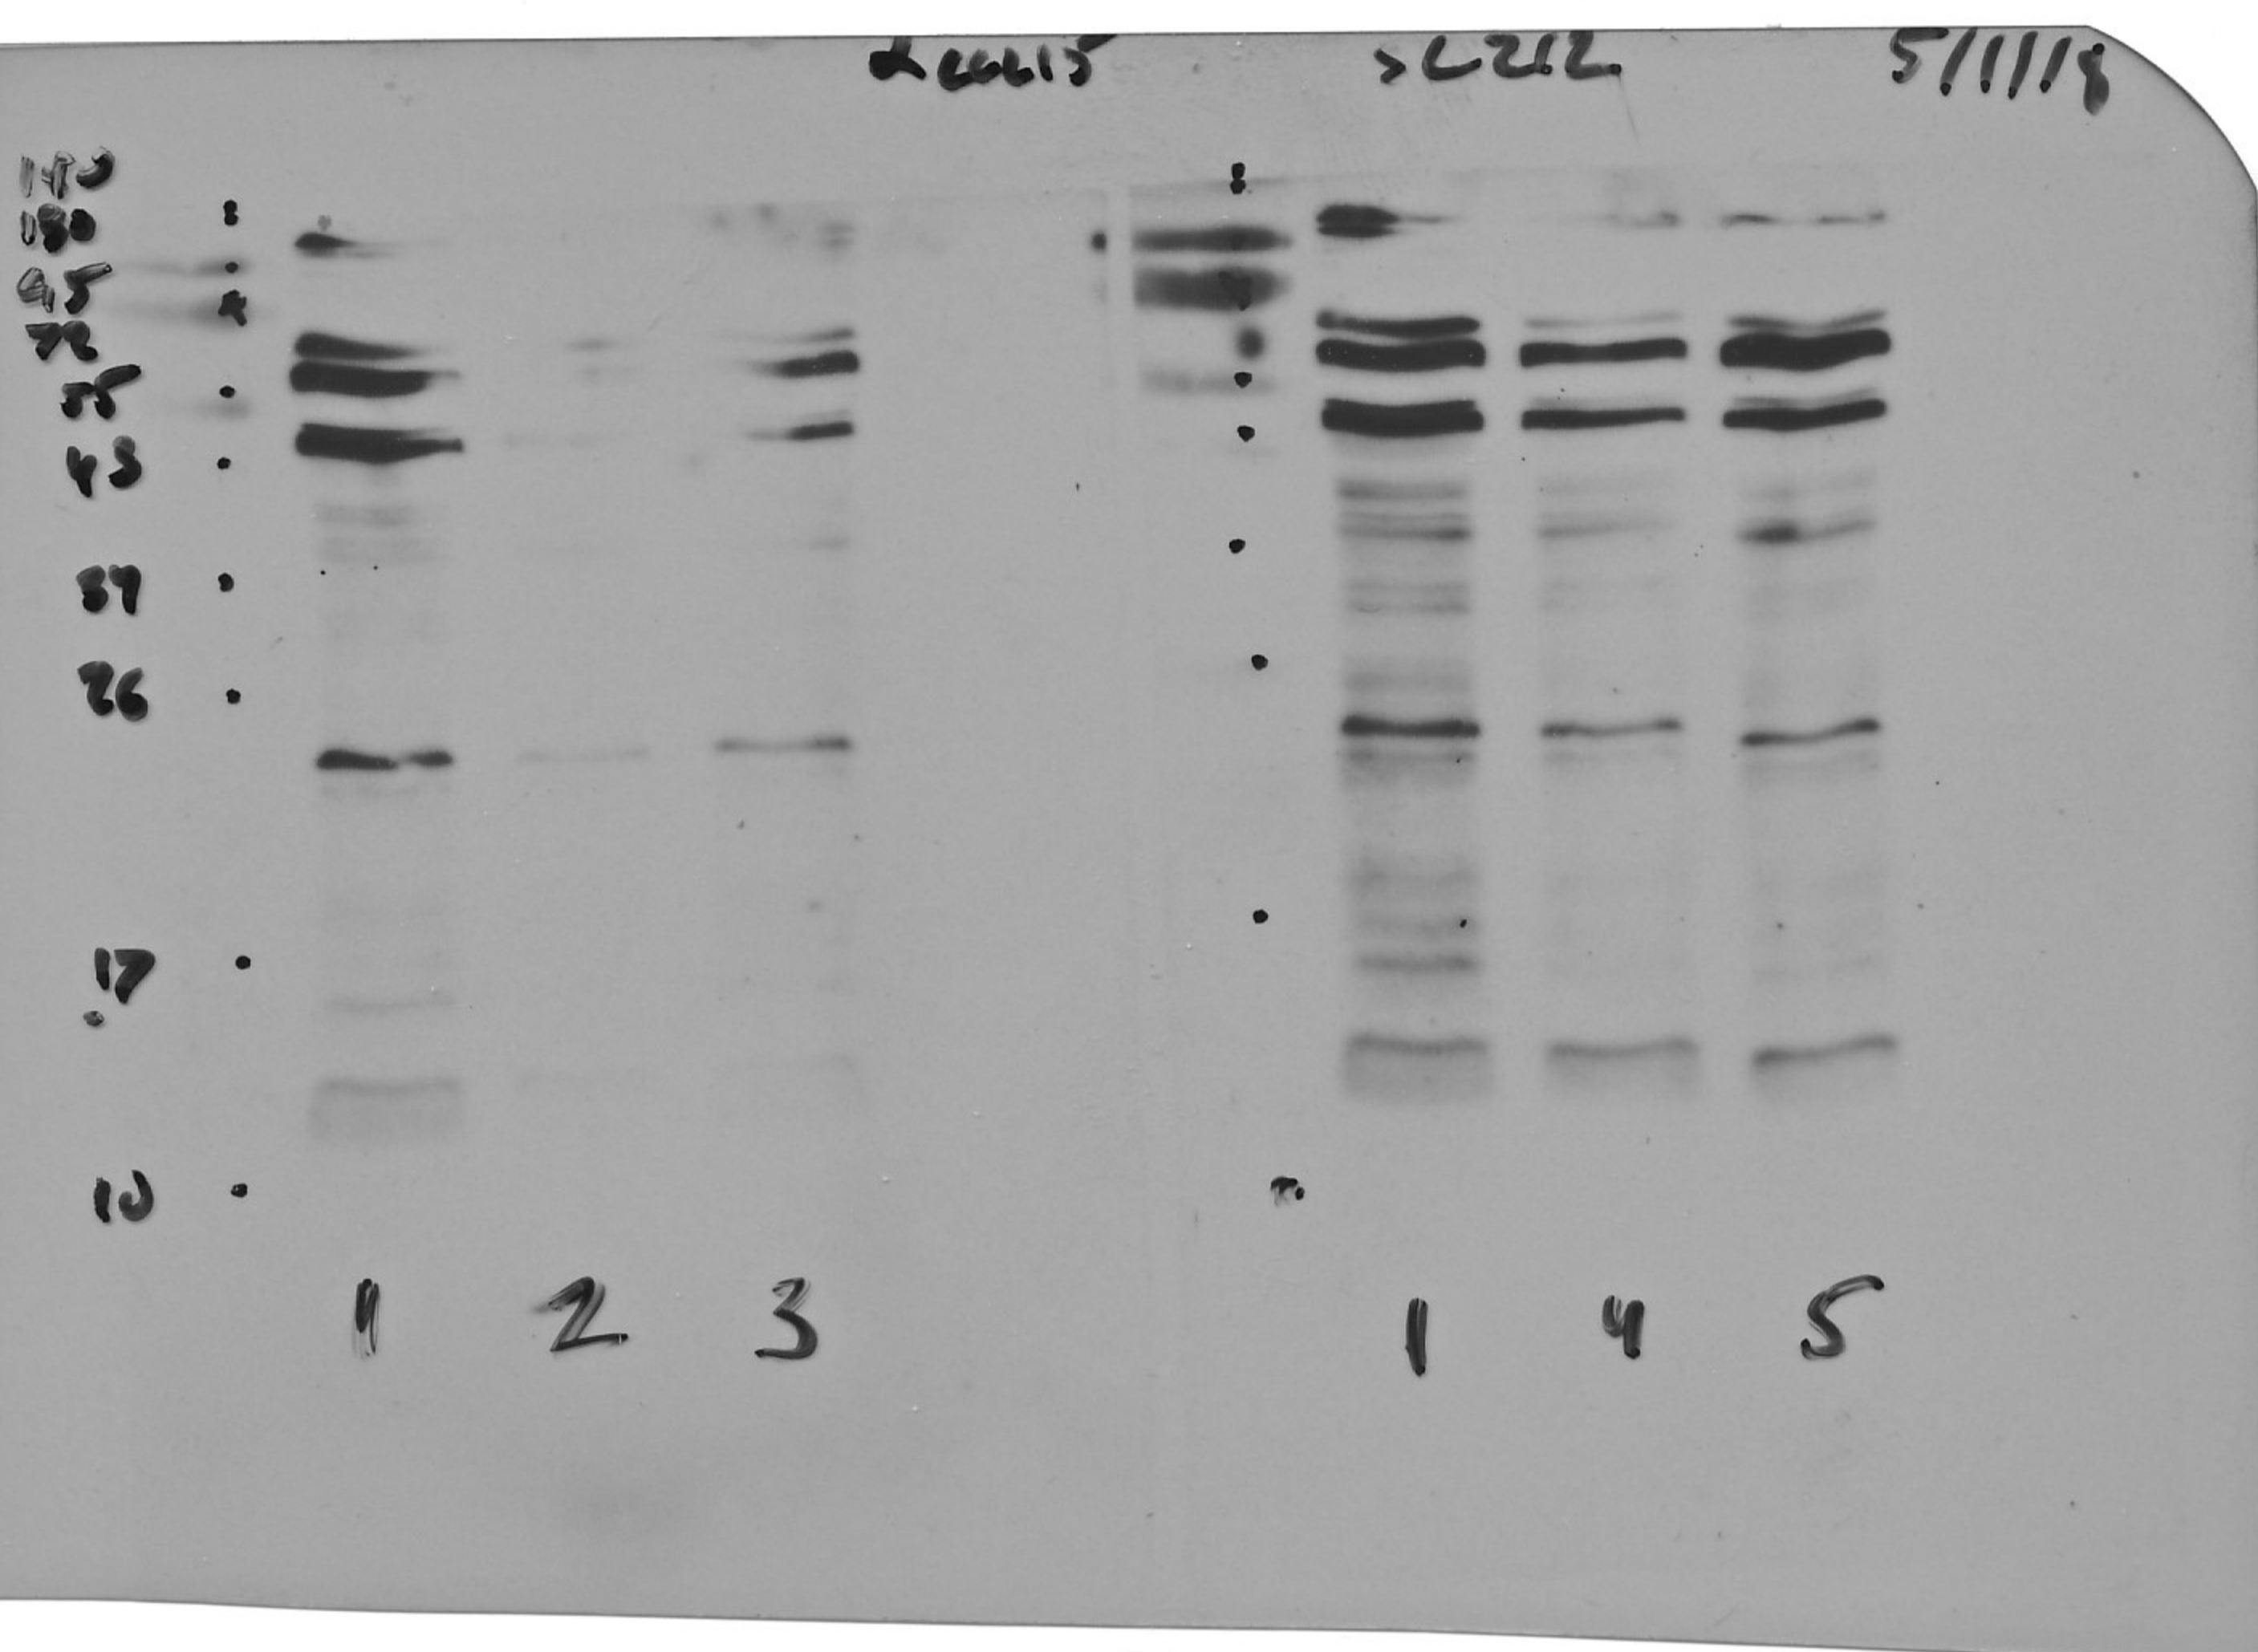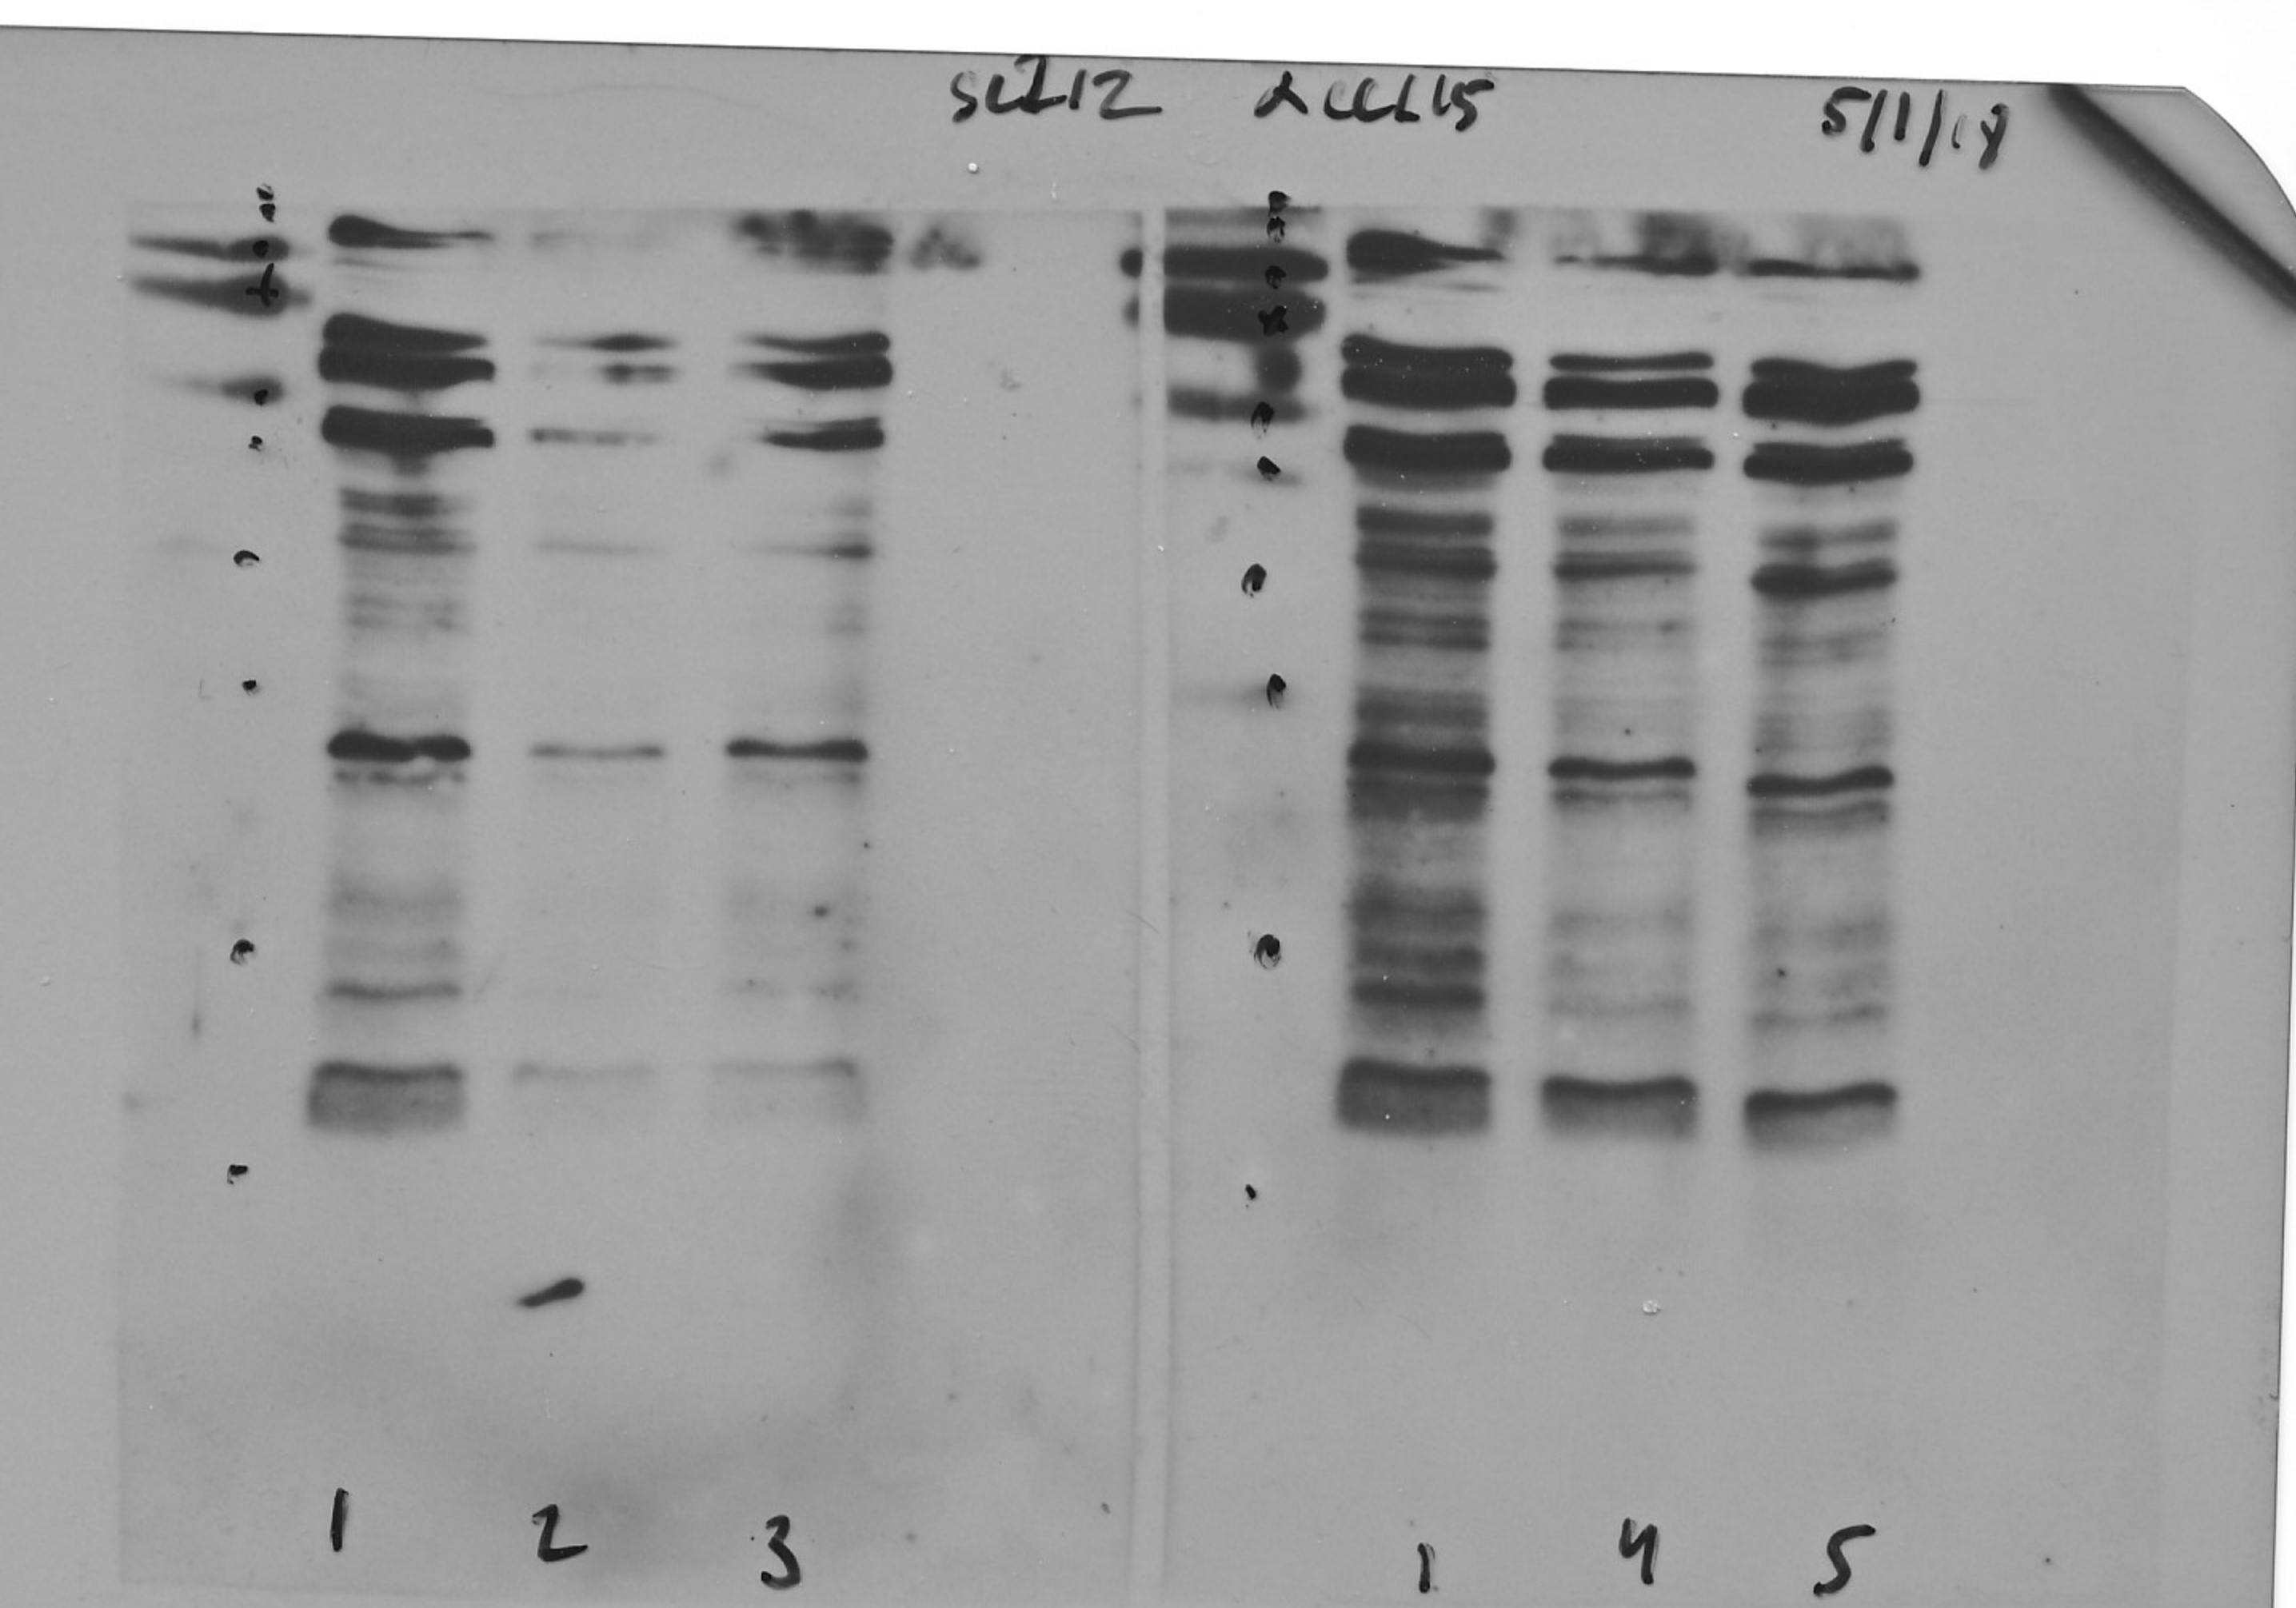



Exp: SL532 3/11/2022

1 2 3

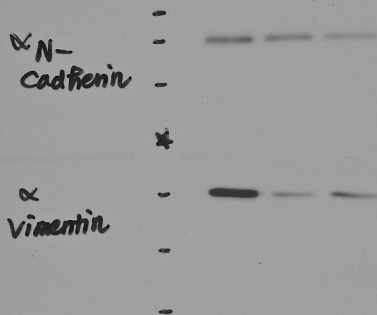

1. SScramble 3/12/2022  
2. SScell15 #1  
3. SScell15 #2 Panc-1  
1 2 3

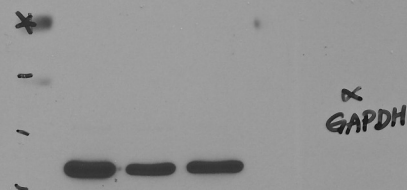

Fig 6C original blots

1. SScramble SL532 Panc-1  
2. SScell15 #1  
3. SScell15 #2 1 2 3

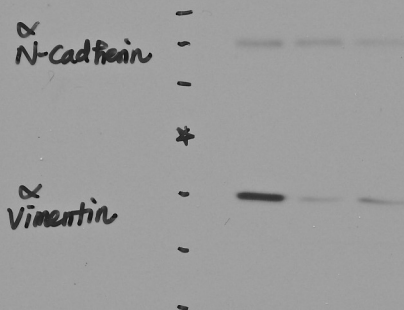

Supplement: s1 [file s1]
