# Supplementary material for: Oncogenic Kras-Mediated Cytokine CCL15 Regulates Pancreatic Cancer Cell Migration and Invasion through ROS
Source: MDPI journal article supplement (doi:10.3390/cancers14092153), 2022-04-26
Supplement: s1 [file s1]

4/11/2022

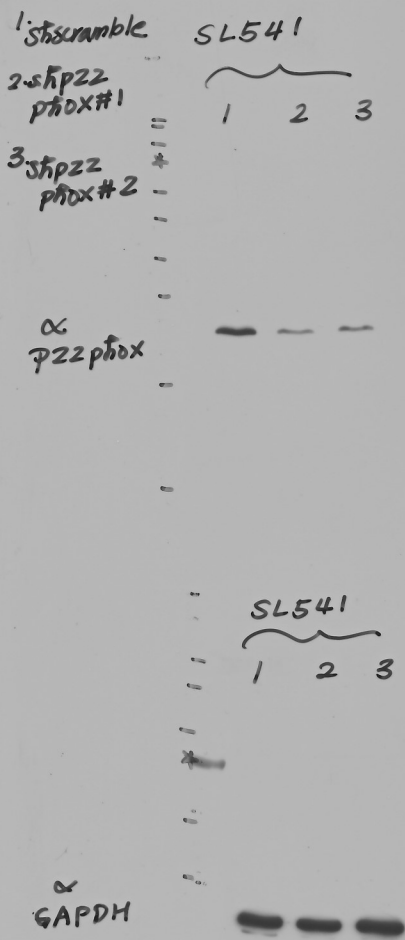

4/11/2022

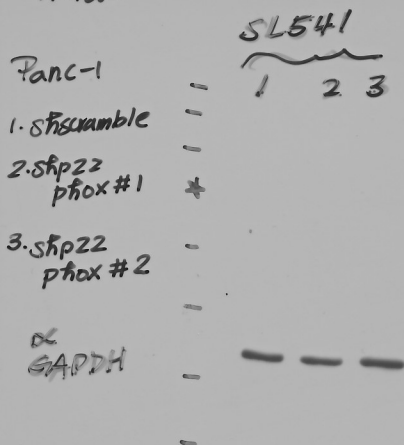

Figure S6A original blot

6/25/2019

SL333

KPC-2

1. shscramble
2. shcul9#1
3. shcul9#2

1 2 3

180 —

130 —

95 —

72 \*

55 —

43 —

34 —

$\alpha$  N-cadherin

6/25/2019

KPC2 SL333

1 2 3

$\alpha$  GAPDH

SL333

KPC2

1. shscramble
2. shcul9#1
3. shcul9#2

1 2 3

—

—

—

\*

—

—

—

$\alpha$  N-cadherin

SL333

KPC2

1 2 3

$\alpha$  GAPDH 1. shscramble

2. shcul9#1 3. shcul9#2

Figure S9 original blot
